# Supplementary material for: Synthesis and photophysical properties of phenanthroimidazole–triarylborane dyads: intriguing ‘turn-on’ sensing mediated by fluoride anions
Source: Royal Society of Chemistry journal article supplement (doi:10.1039/c6ra28559g), 2017-01-01
Supplement: c6ra28559g1.pdf [file c6ra28559g1.pdf]

## Electronic Supplementary Information

### Synthesis and photophysical properties of phenanthroimidazole-triarylborane dyads: Intriguing ‘turn-on’ sensing mediated by fluoride anion

Dong Kyun You,<sup>a</sup> Seon Hee Lee,<sup>b</sup> Ji Hye Lee,<sup>a</sup> Sang Woo Kwak,<sup>c</sup> Hyonseok Hwang,<sup>a</sup> Junseong Lee,<sup>d</sup> Yongseog Chung,<sup>\*c</sup> Myung Hwan Park<sup>\*b</sup> and Kang Mun Lee<sup>\*a</sup>

<sup>a</sup> *Department of Chemistry and Institute for Molecular Science and Fusion Technology,  
Kangwon National University, Chuncheon, Gangwon 24341, Republic of Korea*

<sup>b</sup> *Department of Chemistry Education, Chungbuk National University, Cheongju, Chungbuk 28644,  
Republic of Korea*

<sup>c</sup> *Department of Chemistry, Chungbuk National University, Cheongju, Chungbuk 28644,  
Republic of Korea*

<sup>d</sup> *Department of Chemistry, Chonnam National University, Gwangju 61186, Republic of Korea.*

**Table S1.** Crystallographic data and parameters for **1Ph** and **1BP**

| Compound                                                        | <b>1Ph</b>                                      | <b>1BP</b> ·(THF) <sub>0.5</sub>                                 |
|-----------------------------------------------------------------|-------------------------------------------------|------------------------------------------------------------------|
| Formula                                                         | C <sub>45</sub> H <sub>39</sub> BN <sub>2</sub> | C <sub>107</sub> H <sub>96</sub> B <sub>2</sub> N <sub>4</sub> O |
| Formula weight                                                  | 618.59                                          | 1475.49                                                          |
| Crystal system                                                  | triclinic                                       | monoclinic                                                       |
| Space group                                                     | P <sub>-1</sub>                                 | P2 <sub>1</sub> /n                                               |
| <i>a</i> (Å)                                                    | 8.6872(2)                                       | 10.8270(2)                                                       |
| <i>b</i> (Å)                                                    | 13.4379(3)                                      | 11.8600(2)                                                       |
| <i>c</i> (Å)                                                    | 17.4444(4)                                      | 34.3648(7)                                                       |
| <i>α</i> (°)                                                    | 84.593(2)                                       | 90                                                               |
| <i>β</i> (°)                                                    | 83.569(2)                                       | 94.6387(13)                                                      |
| <i>γ</i> (°)                                                    | 84.507(2)                                       | 90                                                               |
| <i>V</i> (Å <sup>3</sup> )                                      | 2007.12(8)                                      | 4398.27(14)                                                      |
| <i>Z</i>                                                        | 2                                               | 2                                                                |
| $\rho_{\text{calc}}$ (g cm <sup>-3</sup> )                      | 1.024                                           | 1.114                                                            |
| $\mu$ (mm <sup>-1</sup> )                                       | 0.059                                           | 0.064                                                            |
| <i>F</i> (000)                                                  | 656                                             | 1568                                                             |
| <i>T</i> (K)                                                    | 296(2)                                          | 273(2)                                                           |
| Scan mode                                                       | <i>multi-scan</i>                               | <i>multi-scan</i>                                                |
| <i>hkl</i> range                                                | -10 → +10,<br>-13 → +16,<br>-20 → +20           | -12 → +13,<br>-14 → +12,<br>-41 → +41                            |
| Measd reflns                                                    | 26782                                           | 56695                                                            |
| Unique reflns [ <i>R</i> <sub>int</sub> ]                       | 7323 [0.0272]                                   | 8079 [0.0673]                                                    |
| Reflns used for refinement                                      | 7323                                            | 8079                                                             |
| Refined parameters                                              | 3913                                            | 3632                                                             |
| <i>R</i> <sub>1</sub> <sup>a</sup> ( <i>I</i> > 2σ( <i>I</i> )) | 0.0561                                          | 0.0769                                                           |
| <i>wR</i> <sub>2</sub> <sup>b</sup> all data                    | 0.1469                                          | 0.2688                                                           |
| GOF on <i>F</i> <sup>2</sup>                                    | 1.009                                           | 1.044                                                            |
| $\rho_{\text{fin}}$ (max/min) (e Å <sup>-3</sup> )              | 0.197, -0.237                                   | 0.581, -0.214                                                    |

<sup>a</sup>  $R_1 = \sum ||F_o| - |F_c|| / \sum |F_o|$ . <sup>b</sup>  $wR_2 = \{[\sum w(F_o2 - F_c2)^2] / [\sum w(F_o2)^2]\}^{1/2}$ .

**Table S2.** Selected bond lengths (Å) and angles (deg) for **1Ph** and **1BP**

| Compound         | <b>1Ph</b>   | <b>1BP</b> |
|------------------|--------------|------------|
|                  | Bond lengths |            |
| B(1)–C(1)        | 1.570(3)     | 1.574(6)   |
| B(1)–C(10)       | 1.569(3)     | 1.582(6)   |
| B(1)–C(19)       | 1.557(3)     | 1.555(5)   |
| N(1)–C(22)       | 1.444(2)     | –          |
| N(1)–C(28)       | –            | 1.450(5)   |
|                  | Angles       |            |
| C(1)–B(1)–C(10)  | 121.37(18)   | 121.9(3)   |
| C(1)–B(1)–C(19)  | 118.2(2)     | 120.4(4)   |
| C(10)–B(1)–C(19) | 120.39(19)   | 117.6(3)   |

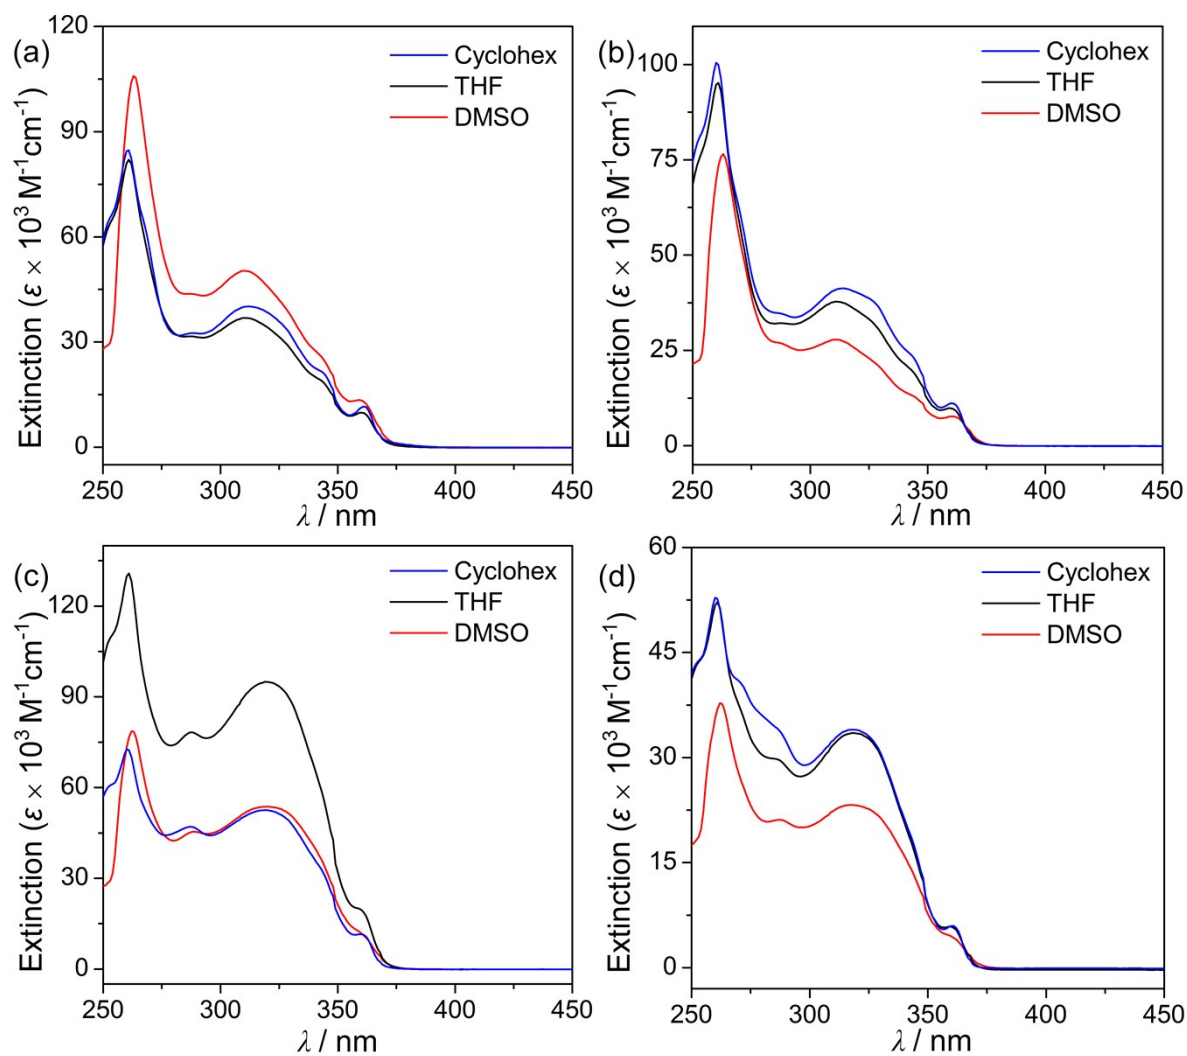

**Fig. S1** UV-vis absorption spectra of (a) **1Ph**, (b) **2Ph**, (c) **1BP** and (d) **2BP** in various solvents ( $2.5 \times 10^{-5} \text{ M}$ ).

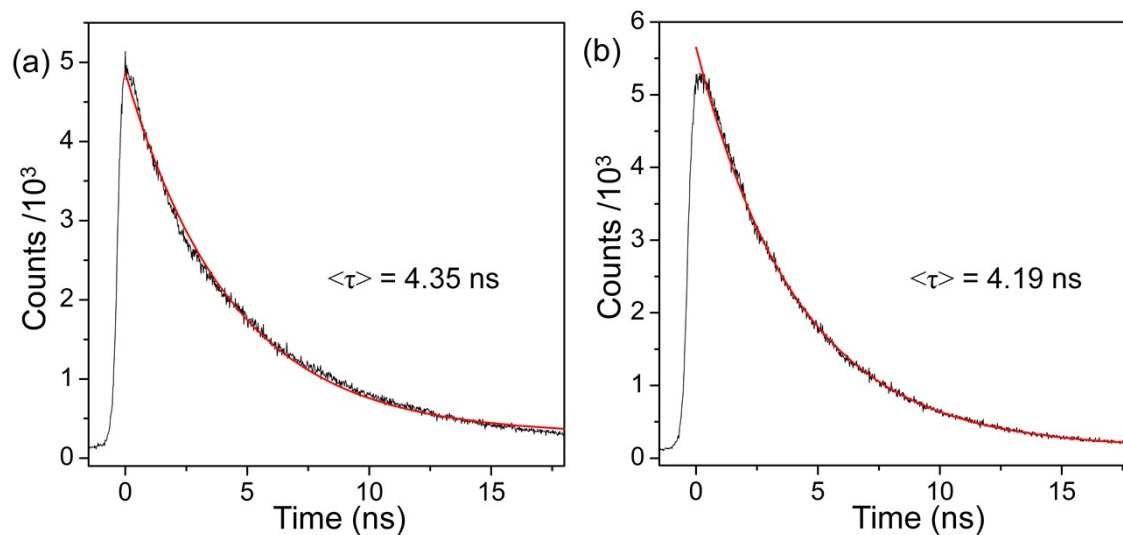

**Fig. S2** Emission decay curve detected at (a) 386 nm and (b) 476 nm of THF ( $5.0 \times 10^{-5}$  M) solution of **1Ph** at 298 K (black line). The red-line corresponds to the single-exponential fitting curve ( $R^2 = 0.9968$  and  $0.9982$ ) for the experimental curve.

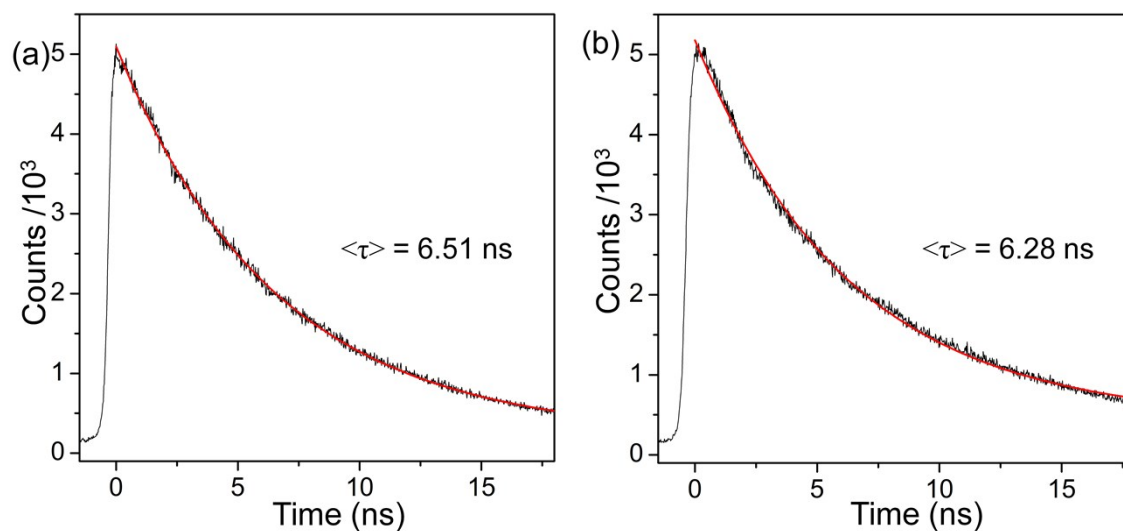

**Fig. S3** Emission decay curve detected at (a) 386 nm and (b) 483 nm of THF ( $5.0 \times 10^{-5}$  M) solution of **2Ph** at 298 K (black line). The red-line corresponds to the single-exponential fitting curve ( $R^2 = 0.9985$  and  $0.9974$ ) for the experimental curve.

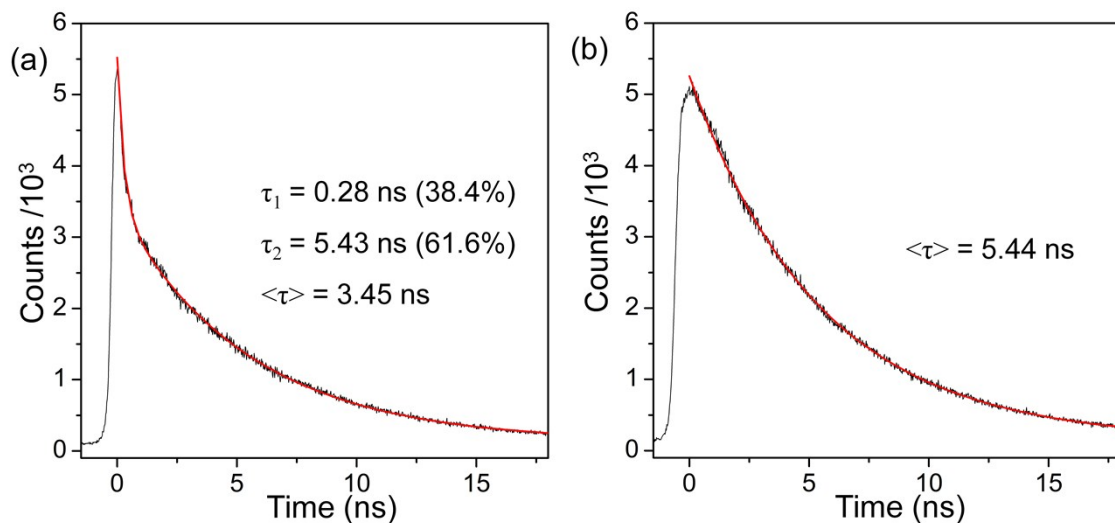

**Fig. S4** Emission decay curve detected at (a) 385 nm and (b) 485 nm of THF ( $5.0 \times 10^{-5}$  M) solution of **1BP** at 298 K (black line). The red-line corresponds to the double or single-exponential fitting curve ( $R^2 = 0.9984$  and  $0.9988$ ) for the experimental curve.

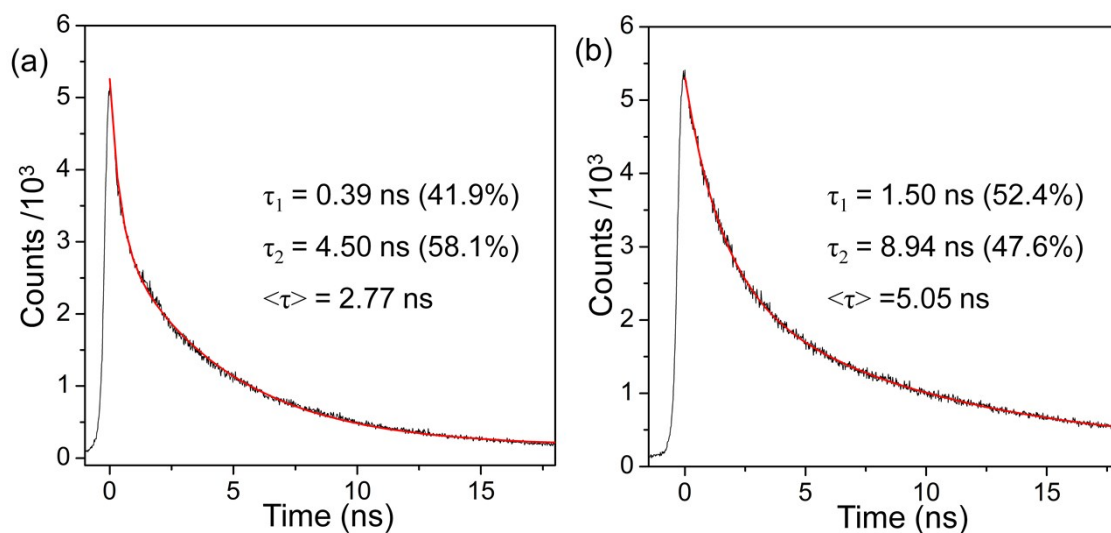

**Fig. S5** Emission decay curve detected at (a) 386 nm and (b) 476 nm of THF ( $5.0 \times 10^{-5}$  M) solution of **2BP** at 298 K (black line). The red-line corresponds to the double-exponential fitting curve ( $R^2 = 0.9984$  and  $0.9984$ ) for the experimental curve.

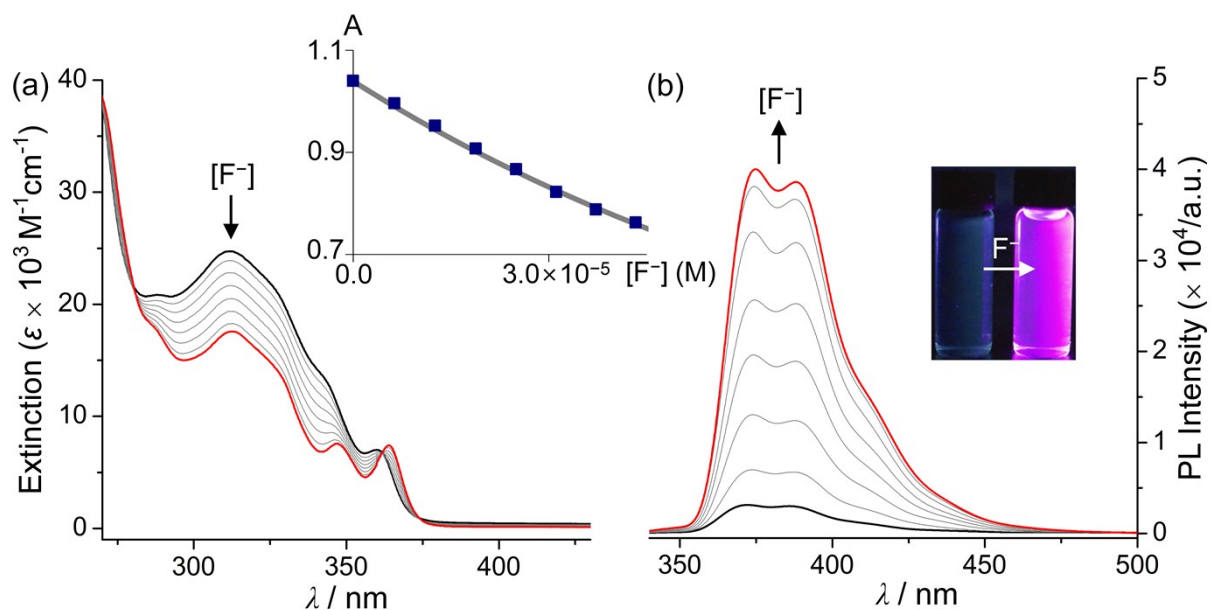

**Fig. S6** Spectral change in the (a) UV-vis absorption and (b) PL intensity of a solution **2Ph** ( $\lambda_{\text{ex}} = 325$  nm) in THF ( $4.00 \times 10^{-5}$  M) upon the addition of TBAF ( $0-4.30 \times 10^{-5}$  M). The inset shows the absorbance at 311 nm as a function of  $[F^-]$ . The line corresponds to the binding isotherm calculated with  $K = 1.1 \times 10^4 \text{ M}^{-1}$

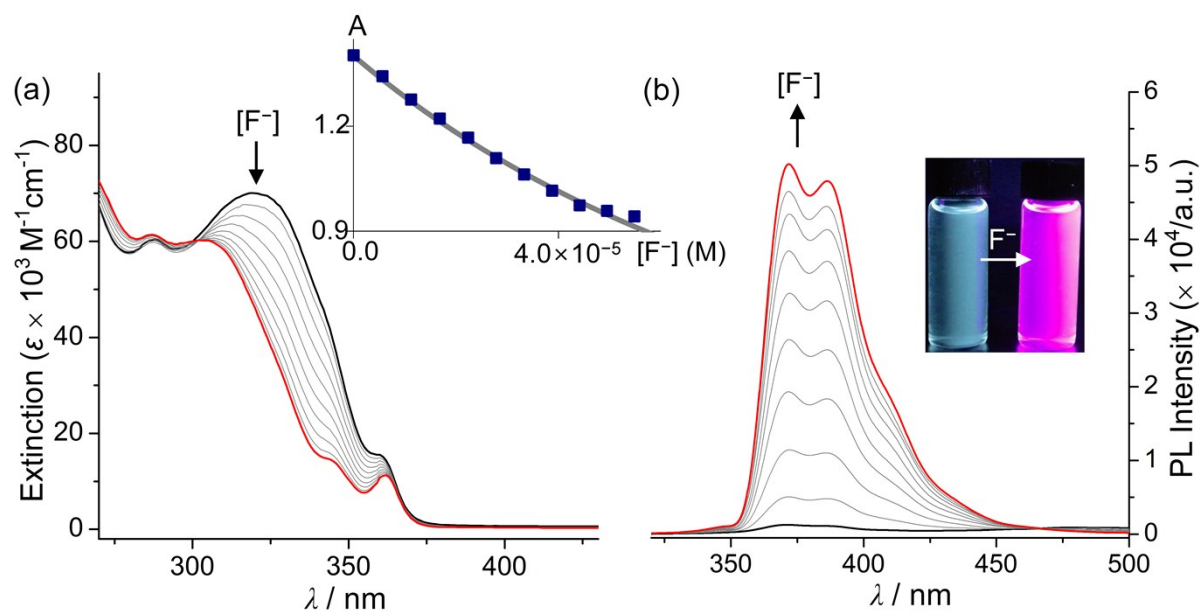

**Fig. S7** Spectral change in the (a) UV-vis absorption and (b) PL intensity of a solution **1BP** ( $\lambda_{\text{ex}} = 296$  nm) in THF ( $2.00 \times 10^{-5}$  M) upon the addition of TBAF ( $0-5.48 \times 10^{-5}$  M). The inset shows the absorbance at 319 nm as a function of  $[F^-]$ . The line corresponds to the binding isotherm calculated with  $K = 1.0 \times 10^4 \text{ M}^{-1}$

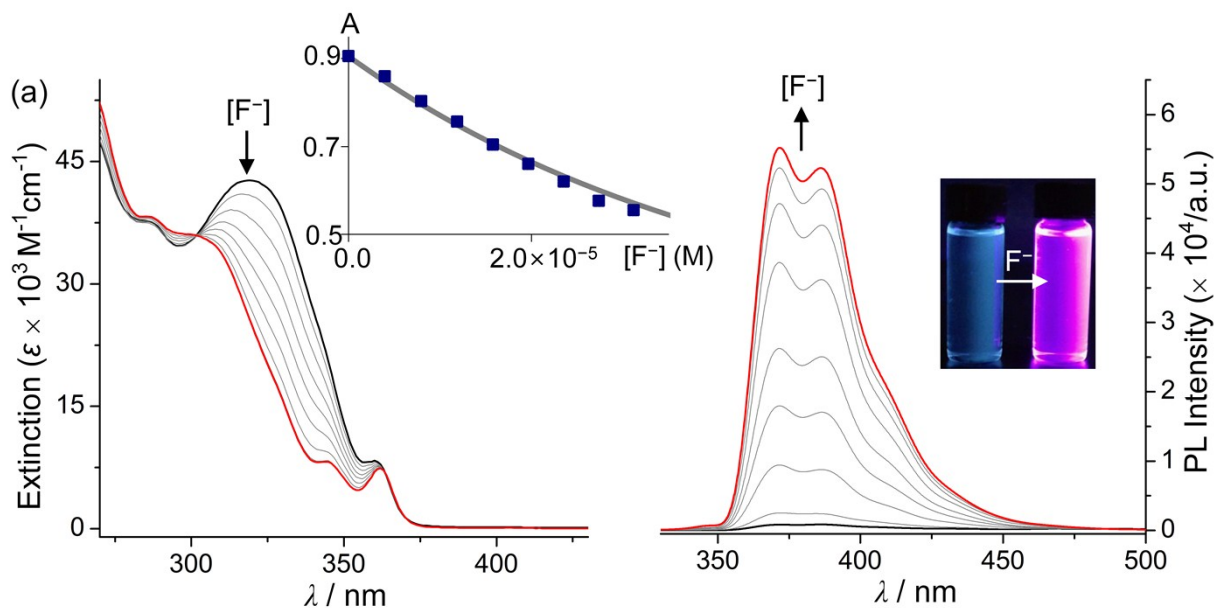

**Fig. S8** Spectral change in the (a) UV–vis absorption and (b) PL intensity of a solution **2BP** ( $\lambda_{\text{ex}} = 292$  nm) in THF ( $2.00 \times 10^{-5}$  M) upon the addition of TBAF ( $0\text{--}3.1 \times 10^{-5}$  M). The inset shows the absorbance at 319 nm as a function of  $[\text{F}^-]$ . The line corresponds to the binding isotherm calculated with  $K = 3.0 \times 10^4 \text{M}^{-1}$

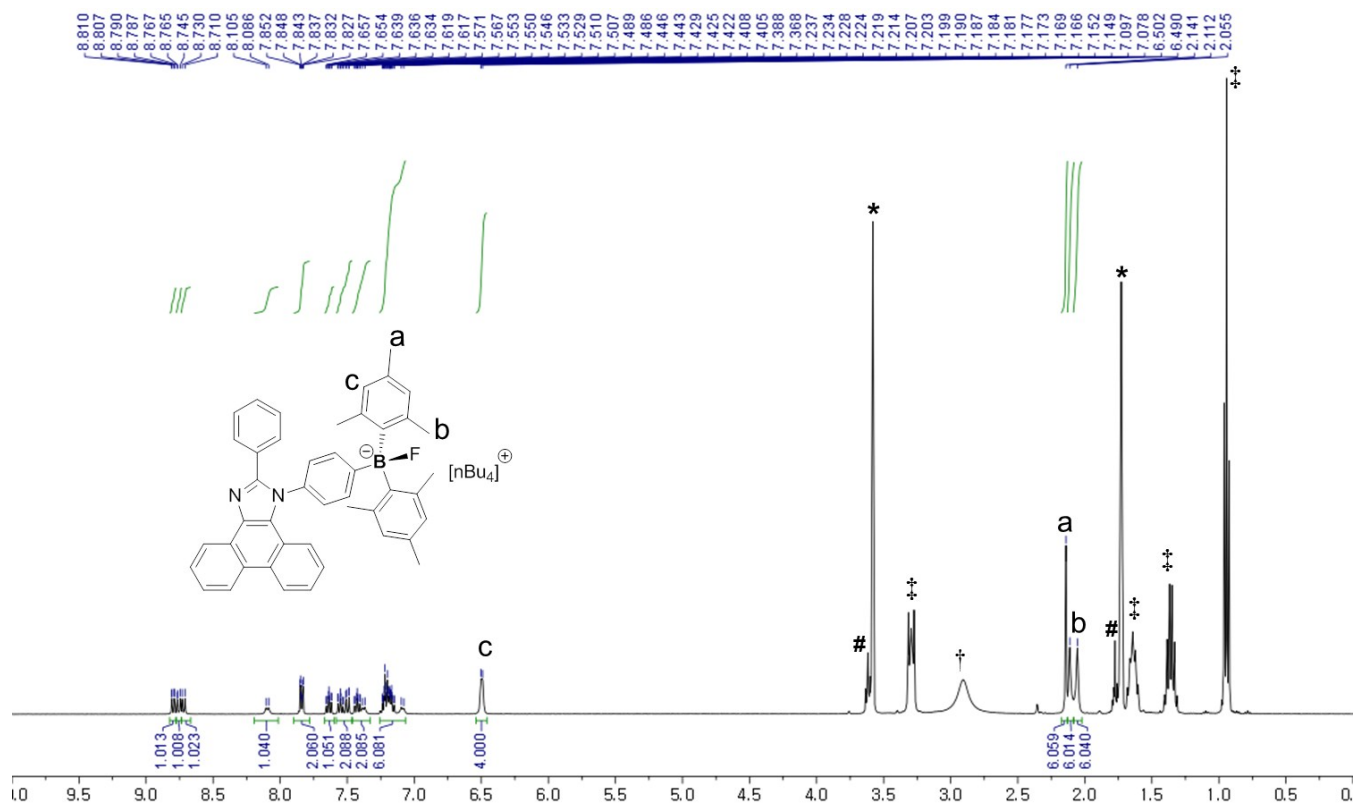

**Fig. S9**  $^1\text{H}$  NMR spectra of **1Ph** with 1.5 equiv TBAF in THF- $d_8$ . (\* from THF- $d_8$ , # from residual THF in THF- $d_8$ , † from  $\text{H}_2\text{O}$ , and ‡ from  $n\text{Bu}$ ).



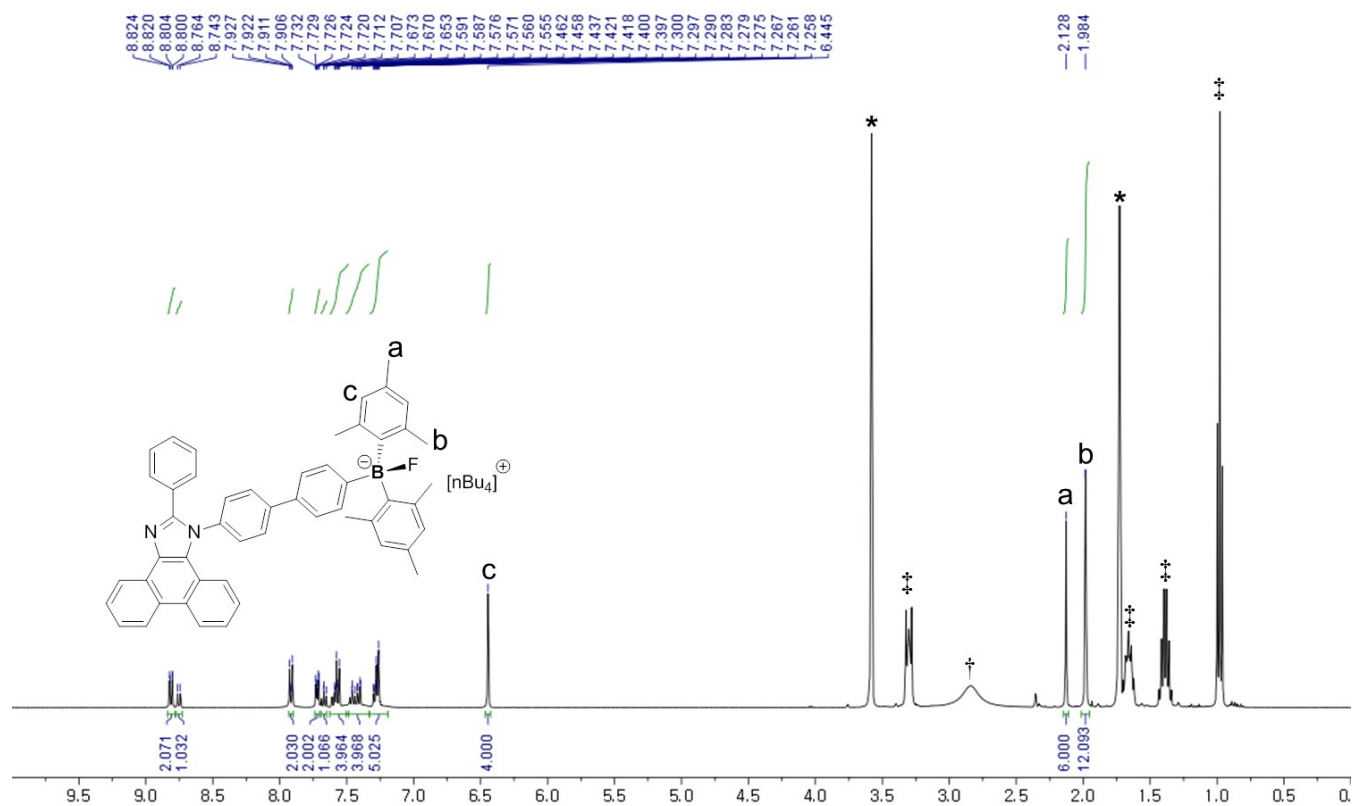

**Fig. S10** <sup>1</sup>H NMR spectra of **1BP** with 1.5 equiv TBAF in THF-*d*<sub>8</sub>. (\* from THF-*d*<sub>8</sub>, † from H<sub>2</sub>O, and ‡ from *n*Bu).

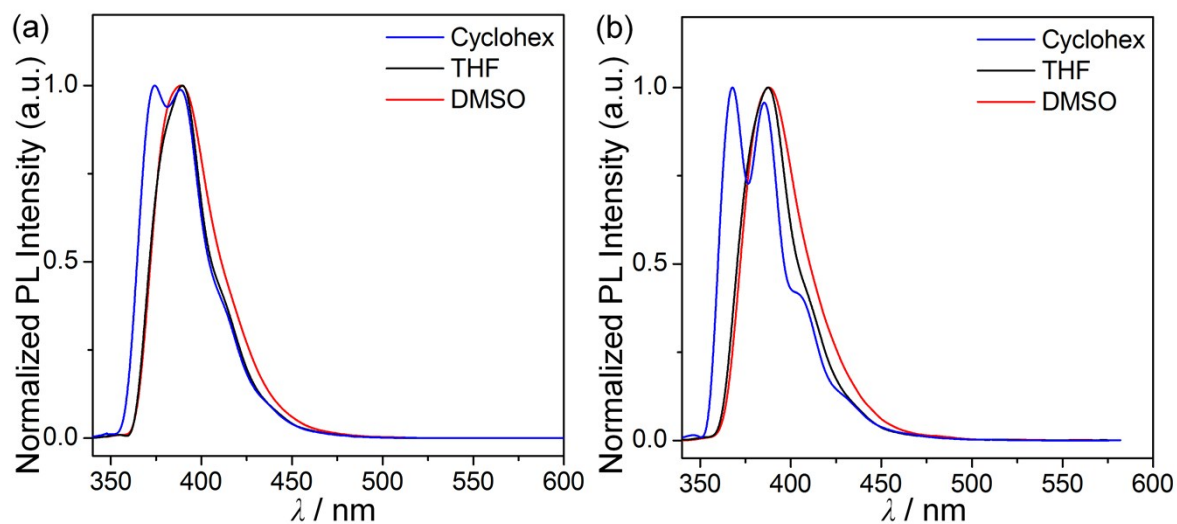

**Fig. S11** The PL emission spectra of (a) [1Ph + 1.5 equiv. Bu<sub>4</sub>NF] ( $\lambda_{\text{ex}} = 326 \text{ nm}$ ) and (b) [1BP + 1.5 equiv. Bu<sub>4</sub>NF] ( $\lambda_{\text{ex}} = 296 \text{ nm}$ ) in various organic solvents at 298 K.

## Computational details

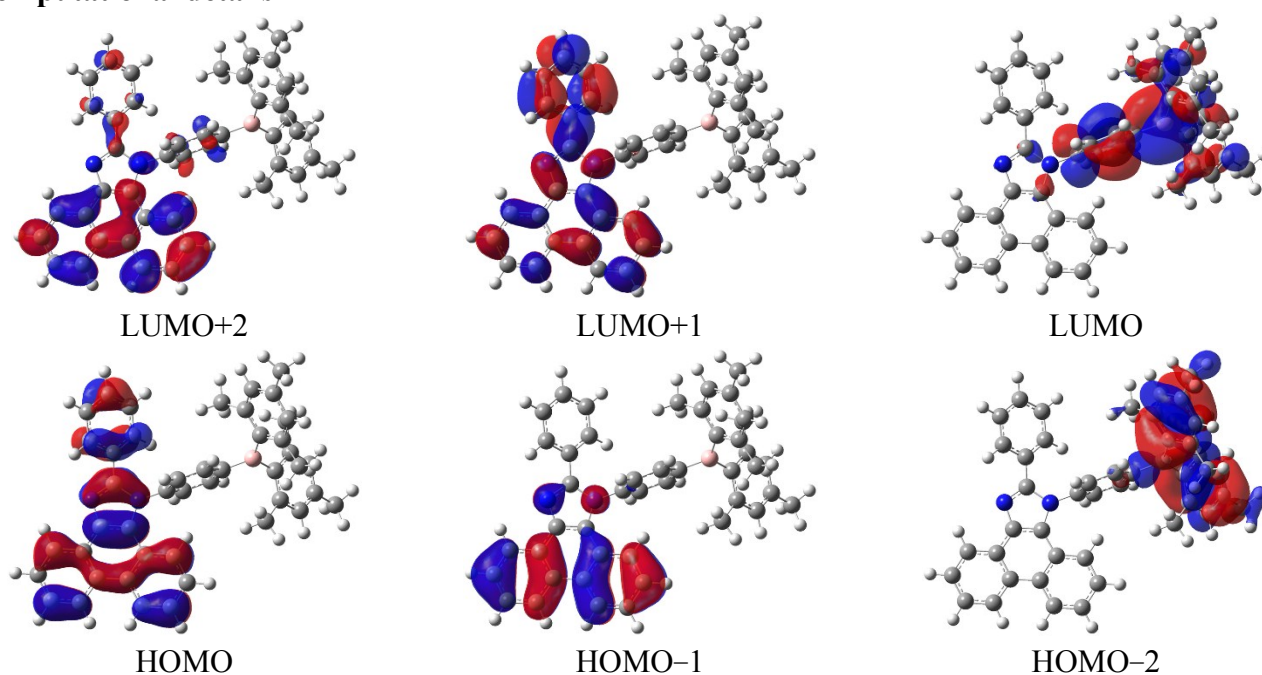

**Fig. S12** Frontier molecular orbitals of **1Ph** from B3LYP/6-31G(d) calculations (Isovalue = 0.04) with CPCM in THF at the ground state ( $S_0$ ) optimized geometries.

**Table S3.** Computed absorption wavelengths ( $\lambda_{\text{calc}}$  in nm) and oscillator strengths ( $f_{\text{calc}}$ ) for **1Ph** from TD-B3LYP/6-31G(d) calculations in THF at the ground state ( $S_0$ ) optimized geometries

| state | $\lambda$ /nm | $f_{\text{calc}}$ | major contribution                                                                                                                               |
|-------|---------------|-------------------|--------------------------------------------------------------------------------------------------------------------------------------------------|
| 1     | 414.75        | 0.0088            | HOMO $\rightarrow$ LUMO (99.2%)                                                                                                                  |
| 2     | 362.34        | 0.1090            | HOMO-2 $\rightarrow$ LUMO (98.4%)                                                                                                                |
| 3     | 346.20        | 0.0687            | HOMO-3 $\rightarrow$ LUMO (98.0%)                                                                                                                |
| 4     | 338.21        | 0.0530            | HOMO-4 $\rightarrow$ LUMO (25.2%)<br>HOMO-1 $\rightarrow$ LUMO (64.9%)                                                                           |
| 5     | 336.59        | 0.0928            | HOMO-4 $\rightarrow$ LUMO (71.2%)<br>HOMO-1 $\rightarrow$ LUMO (17.1%)                                                                           |
| 6     | 333.06        | 0.2510            | HOMO-5 $\rightarrow$ LUMO (12.1%)<br>HOMO-1 $\rightarrow$ LUMO (15.8%)<br>HOMO $\rightarrow$ LUMO+1 (53.5%)<br>HOMO $\rightarrow$ LUMO+2 (11.2%) |

**Table S4.** Molecular orbital energies (in eV) and distributions (in %) of **1Ph** at the ground state ( $S_0$ ) optimized geometries

|        | E (eV) | Phenanthro<br>-imidazole | dimesitylborane | bridged phenyl |
|--------|--------|--------------------------|-----------------|----------------|
| LUMO+2 | -0.93  | 94.3                     | 1.2             | 4.5            |
| LUMO+1 | -1.19  | 98.2                     | 1.0             | 0.8            |
| LUMO   | -1.98  | 2.4                      | 61.9            | 35.6           |
| HOMO   | -5.44  | 99.6                     | 0.0             | 0.4            |
| HOMO-1 | -6.07  | 99.3                     | 0.1             | 0.6            |
| HOMO-2 | -6.19  | 0.0                      | 95.6            | 4.4            |

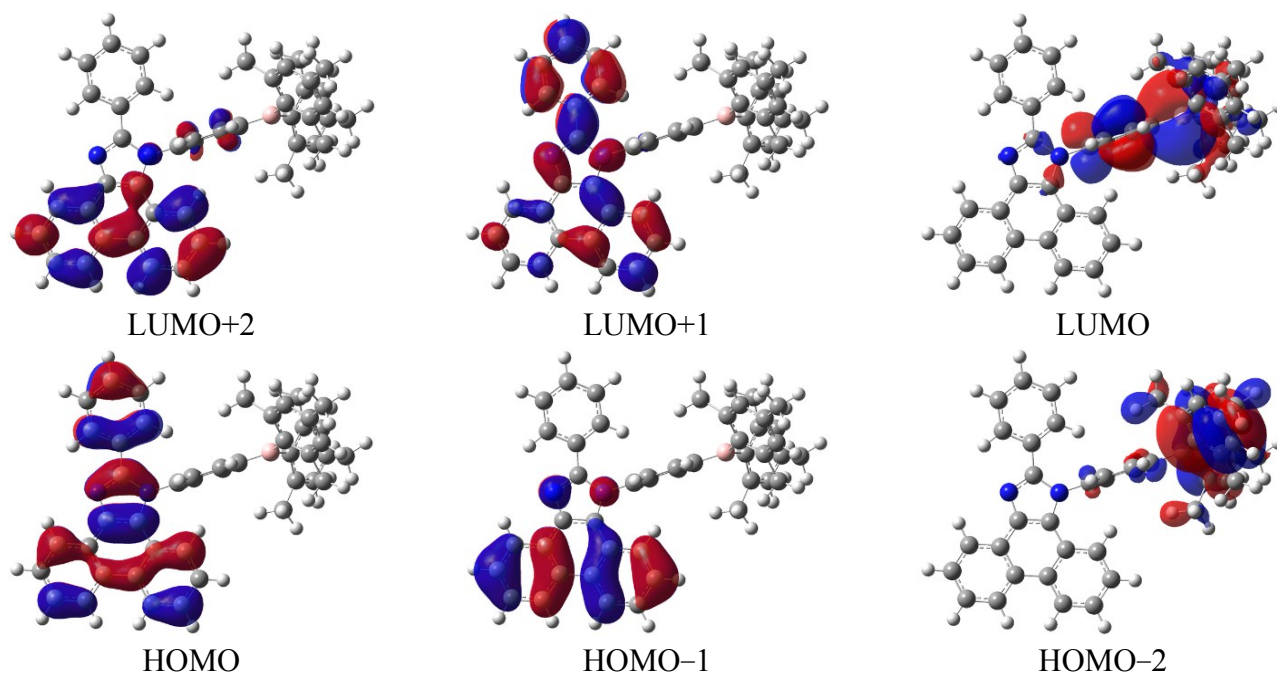

**Fig. S13** Frontier molecular orbitals of **1Ph** from B3LYP/6-31G(d) calculations (Isovalue = 0.04) with CPCM in THF at the first excited state ( $S_1$ ) optimized geometries.

**Table S5.** Computed absorption wavelengths ( $\lambda_{\text{calc}}$  in nm) and oscillator strengths ( $f_{\text{calc.}}$ ) for **1Ph** from TD-B3LYP/6-31G(d) calculations in THF at the first excited state ( $S_1$ ) optimized geometries

| state | $\lambda$ /nm | $f_{\text{calc}}$ | major contribution                                                     |
|-------|---------------|-------------------|------------------------------------------------------------------------|
| 1     | 520.27        | 0.0003            | HOMO $\rightarrow$ LUMO (99.4%)                                        |
| 2     | 394.13        | 0.0695            | HOMO-3 $\rightarrow$ LUMO (87.3%)<br>HOMO-2 $\rightarrow$ LUMO (11.4%) |
| 3     | 388.47        | 0.0691            | HOMO-3 $\rightarrow$ LUMO (11.2%)<br>HOMO-2 $\rightarrow$ LUMO (85.6%) |
| 4     | 373.95        | 0.0758            | HOMO-4 $\rightarrow$ LUMO (98.6%)                                      |
| 5     | 367.43        | 0.0017            | HOMO-1 $\rightarrow$ LUMO (97.2%)                                      |
| 6     | 363.20        | 0.0076            | HOMO-5 $\rightarrow$ LUMO (95.7%)                                      |
| 7     | 361.20        | 0.7249            | HOMO $\rightarrow$ LUMO+1 (88.7%)                                      |

**Table S6.** Molecular orbital energies (in eV) and distributions (in %) of **1Ph** at the first excited state ( $S_1$ ) optimized geometries

|        | E (eV) | Phenanthro<br>-imidazole | dimesitylborane | bridged phenyl |
|--------|--------|--------------------------|-----------------|----------------|
| LUMO+2 | -0.92  | 95.4                     | 0.1             | 4.5            |
| LUMO+1 | -1.37  | 99.2                     | 0.1             | 0.7            |
| LUMO   | -2.32  | 2.1                      | 50.2            | 47.7           |
| HOMO   | -5.21  | 99.8                     | 0.0             | 0.2            |
| HOMO-1 | -6.13  | 98.9                     | 0.7             | 0.4            |
| HOMO-2 | -6.23  | 0.9                      | 96.2            | 2.9            |

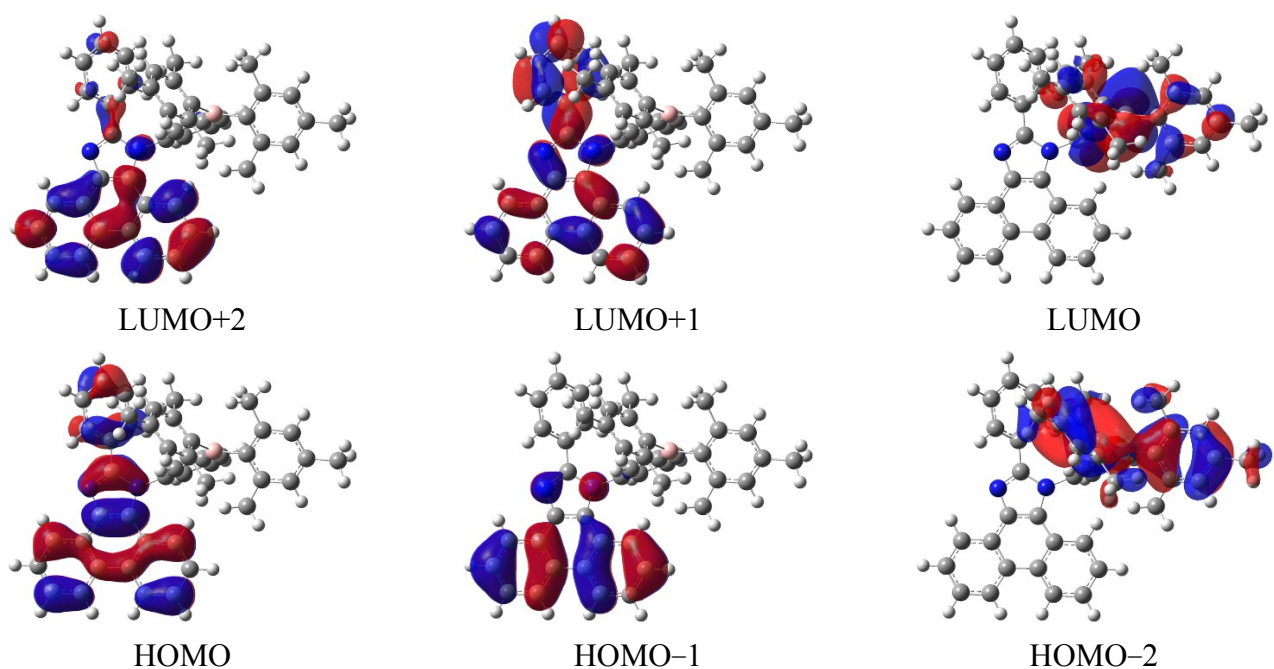

**Fig. S14** Frontier molecular orbitals of **2Ph** from B3LYP/6-31G(d) calculations (Isovalue = 0.04) with CPCM in THF at the ground state ( $S_0$ ) optimized geometries.

**Table S7.** Computed absorption wavelengths ( $\lambda_{\text{calc}}$  in nm) and oscillator strengths ( $f_{\text{calc.}}$ ) for **2Ph** from TD-B3LYP/6-31G(d) calculations in THF at the ground state ( $S_0$ ) optimized geometries

| state | $\lambda$ /nm | $f_{\text{calc}}$ | major contribution                                                     |
|-------|---------------|-------------------|------------------------------------------------------------------------|
| 1     | 410.42        | 0.0011            | HOMO $\rightarrow$ LUMO (99.5%)                                        |
| 2     | 360.11        | 0.1043            | HOMO-2 $\rightarrow$ LUMO (94.6%)                                      |
| 3     | 344.23        | 0.0416            | HOMO-3 $\rightarrow$ LUMO (96.9%)                                      |
| 4     | 335.77        | 0.0763            | HOMO-4 $\rightarrow$ LUMO (92.6%)                                      |
| 5     | 334.62        | 0.0064            | HOMO-1 $\rightarrow$ LUMO (89.6%)                                      |
| 6     | 332.62        | 0.3004            | HOMO $\rightarrow$ LUMO+1 (71.0%)<br>HOMO $\rightarrow$ LUMO+2 (17.5%) |

**Table S8.** Molecular orbital energies (in eV) and distributions (in %) of **2Ph** at the ground state ( $S_0$ ) optimized geometries

|        | E (eV) | Phenanthro-<br>imidazole | dimesitylborane | bridged phenyl |
|--------|--------|--------------------------|-----------------|----------------|
| LUMO+2 | -0.91  | 97.7                     | 1.3             | 1.0            |
| LUMO+1 | -1.16  | 98.9                     | 0.4             | 0.7            |
| LUMO   | -1.94  | 1.1                      | 63.1            | 35.9           |
| HOMO   | -5.44  | 99.7                     | 0.0             | 0.3            |
| HOMO-1 | -6.06  | 98.1                     | 1.3             | 0.6            |
| HOMO-2 | -6.19  | 1.7                      | 94.1            | 4.3            |

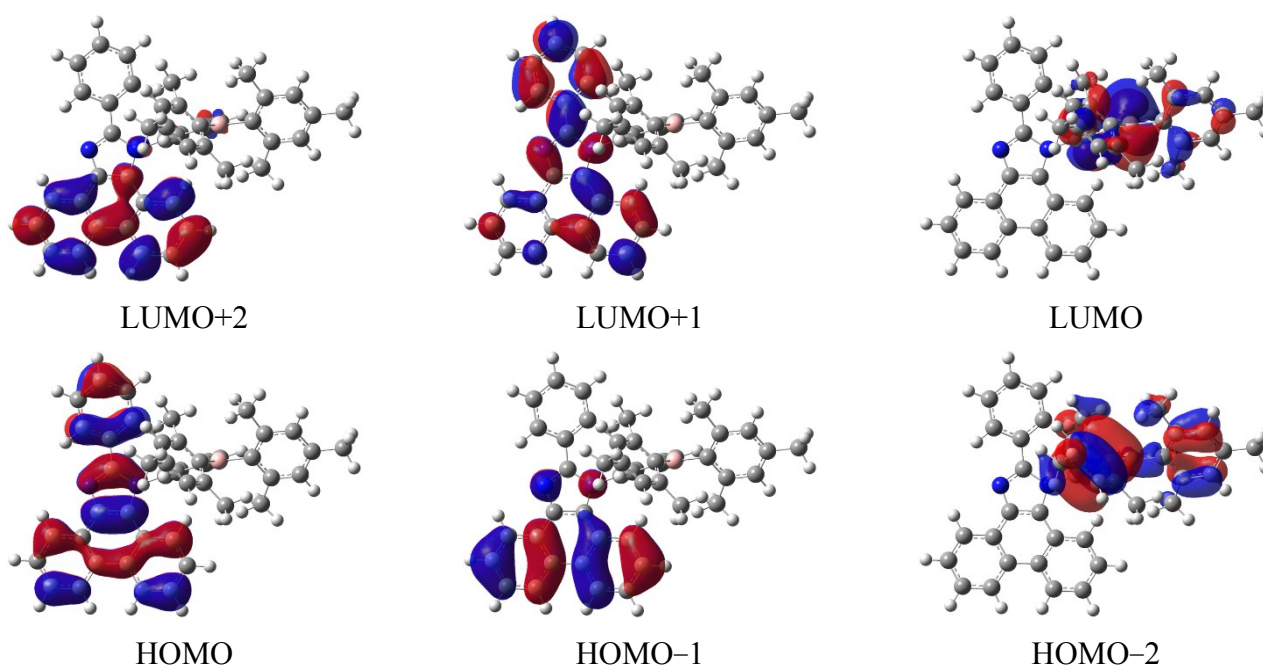

**Fig. S15** Frontier molecular orbitals of **2Ph** from B3LYP/6-31G(d) calculations (Isovalue = 0.04) with CPCM in THF at the first excited state ( $S_1$ ) optimized geometries.

**Table S9.** Computed absorption wavelengths ( $\lambda_{\text{calc}}$  in nm) and oscillator strengths ( $f_{\text{calc.}}$ ) for **2Ph** from TD-B3LYP/6-31G(d) calculations in THF at the first excited state ( $S_1$ ) optimized geometries

| state | $\lambda$ /nm | $f_{\text{calc}}$ | major contribution                                                     |
|-------|---------------|-------------------|------------------------------------------------------------------------|
| 1     | 522.86        | 0.0003            | HOMO $\rightarrow$ LUMO (99.7%)                                        |
| 2     | 394.18        | 0.0678            | HOMO-3 $\rightarrow$ LUMO (51.2%)<br>HOMO-2 $\rightarrow$ LUMO (43.9%) |
| 3     | 387.13        | 0.0488            | HOMO-3 $\rightarrow$ LUMO (44.7%)<br>HOMO-2 $\rightarrow$ LUMO (53.0%) |
| 4     | 374.43        | 0.0646            | HOMO-4 $\rightarrow$ LUMO (97.7%)                                      |
| 5     | 369.10        | 0.0004            | HOMO-1 $\rightarrow$ LUMO (95.9%)                                      |
| 6     | 363.62        | 0.0068            | HOMO-5 $\rightarrow$ LUMO (95.3%)                                      |
| 7     | 360.37        | 0.6975            | HOMO $\rightarrow$ LUMO+1 (88.0%)                                      |

**Table S10.** Molecular orbital energies (in eV) and distributions (in %) of **2Ph** at the first excited state ( $S_1$ ) optimized geometries

|        | E (eV) | Phenanthro<br>-imidazole | dimesitylborane | bridged phenyl |
|--------|--------|--------------------------|-----------------|----------------|
| LUMO+2 | -0.89  | 97.6                     | 0.5             | 1.9            |
| LUMO+1 | -1.33  | 99.2                     | 0.1             | 0.7            |
| LUMO   | -2.31  | 1.1                      | 51.0            | 47.9           |
| HOMO   | -5.19  | 99.8                     | 0.0             | 0.1            |
| HOMO-1 | -6.11  | 98.5                     | 1.1             | 0.5            |
| HOMO-2 | -6.22  | 0.7                      | 96.6            | 2.6            |



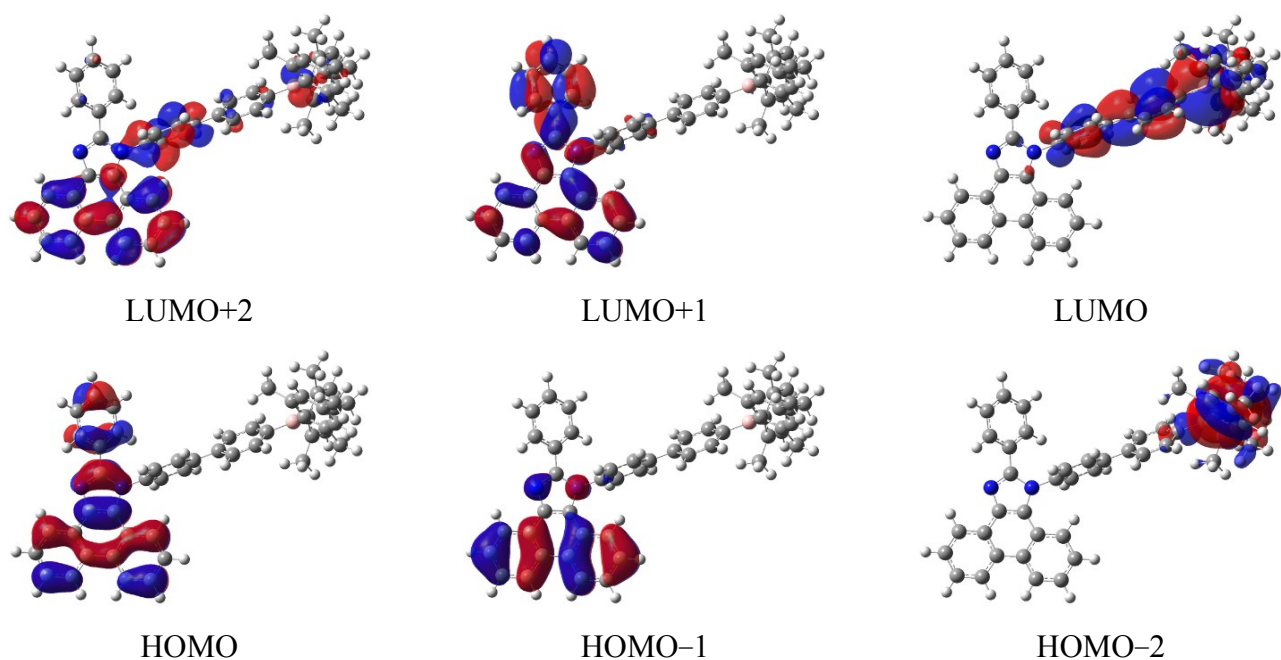

**Fi. S16** Frontier molecular orbitals of **1BP** from B3LYP/6-31G(d) calculations (Isovalue = 0.04) with CPCM in THF at the ground state ( $S_0$ ) optimized geometries.

**Table S11.** Computed absorption wavelengths ( $\lambda_{\text{calc}}$  in nm) and oscillator strengths ( $f_{\text{calc.}}$ ) for **1BP** from TD-B3LYP/6-31G(d) calculations in THF at the ground state ( $S_0$ ) optimized geometries

| state | $\lambda$ /nm | $f_{\text{calc}}$ | major contribution                                                     |
|-------|---------------|-------------------|------------------------------------------------------------------------|
| 1     | 395.98        | 0.0117            | HOMO $\rightarrow$ LUMO (98.2%)                                        |
| 2     | 361.18        | 0.0977            | HOMO-2 $\rightarrow$ LUMO (97.3%)                                      |
| 3     | 349.44        | 0.3012            | HOMO-3 $\rightarrow$ LUMO (94.5%)                                      |
| 4     | 337.96        | 0.1293            | HOMO-4 $\rightarrow$ LUMO (95.6%)                                      |
| 5     | 333.26        | 0.3213            | HOMO $\rightarrow$ LUMO+1 (66.5%)<br>HOMO $\rightarrow$ LUMO+2 (20.0%) |



**Table S12.** Molecular orbital energies (in eV) and distributions (in %) of **1BP** at the ground state ( $S_0$ ) optimized geometries

|        | E (eV) | Phenanthro-<br>imidazole | dimesitylborane | bridged phenyl |
|--------|--------|--------------------------|-----------------|----------------|
| LUMO+2 | -0.96  | 76.3                     | 6.7             | 17.1           |
| LUMO+1 | -1.18  | 96.4                     | 1.1             | 2.4            |
| LUMO   | -1.97  | 0.9                      | 51.0            | 48.1           |
| HOMO   | -5.44  | 99.5                     | 0.0             | 0.4            |
| HOMO-1 | -6.07  | 97.8                     | 0.4             | 1.8            |
| HOMO-2 | -6.15  | 0.0                      | 95.4            | 4.6            |

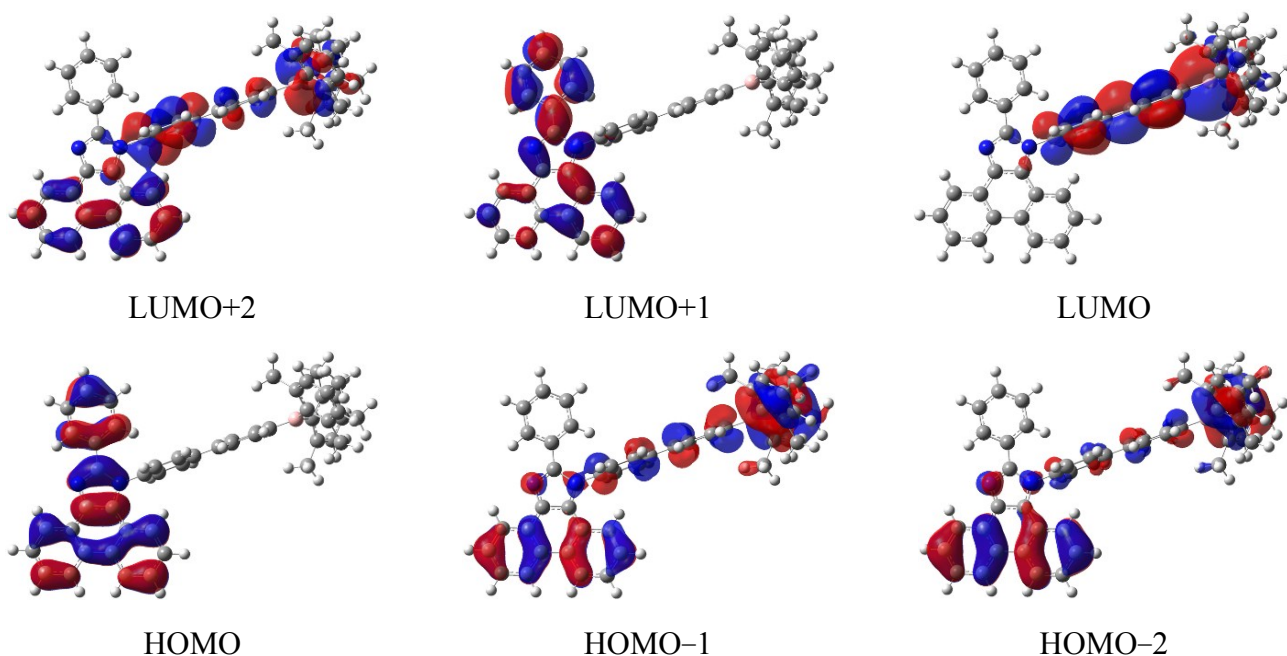

**Fig. S17** Frontier molecular orbitals of **1BP** from B3LYP/6-31G(d) calculations (Isovalue = 0.04) with CPCM in THF at the first excited state ( $S_1$ ) optimized geometries.

**Table S13.** Computed absorption wavelengths ( $\lambda_{\text{calc}}$  in nm) and oscillator strengths ( $f_{\text{calc.}}$ ) for **1BP** from TD-B3LYP/6-31G(d) calculations in THF at the first excited state ( $S_1$ ) optimized geometries

| state | $\lambda$ /nm | $f_{\text{calc}}$ | major contribution                                                     |
|-------|---------------|-------------------|------------------------------------------------------------------------|
| 1     | 508.14        | 0.0024            | HOMO $\rightarrow$ LUMO (98.9%)                                        |
| 2     | 397.60        | 0.0596            | HOMO-3 $\rightarrow$ LUMO (95.2%)                                      |
| 3     | 396.57        | 0.3694            | HOMO-2 $\rightarrow$ LUMO (30.7%)<br>HOMO-1 $\rightarrow$ LUMO (61.2%) |
| 4     | 378.74        | 0.1220            | HOMO-4 $\rightarrow$ LUMO (95.4%)                                      |
| 5     | 365.06        | 0.0045            | HOMO-5 $\rightarrow$ LUMO (98.3%)                                      |
| 6     | 364.59        | 0.0082            | HOMO-2 $\rightarrow$ LUMO (65.1%)<br>HOMO-1 $\rightarrow$ LUMO (32.3%) |
| 7     | 359.61        | 0.7675            | HOMO $\rightarrow$ LUMO+1 (89.8%)                                      |

**Table S14.** Molecular orbital energies (in eV) and distributions (in %) of **1BP** at the first excited state ( $S_1$ ) optimized geometries

|        | E (eV) | Phenanthro<br>-imidazole | dimesitylborane | bridged phenyl |
|--------|--------|--------------------------|-----------------|----------------|
| LUMO+2 | -0.95  | 39.3                     | 24.7            | 36.1           |
| LUMO+1 | -1.34  | 98.9                     | 0.2             | 0.9            |
| LUMO   | -2.38  | 1.1                      | 34.2            | 64.7           |
| HOMO   | -5.21  | 99.8                     | 0.0             | 0.2            |
| HOMO-1 | -6.11  | 35.6                     | 43.3            | 21.1           |
| HOMO-2 | -6.13  | 64.8                     | 26.5            | 8.6            |

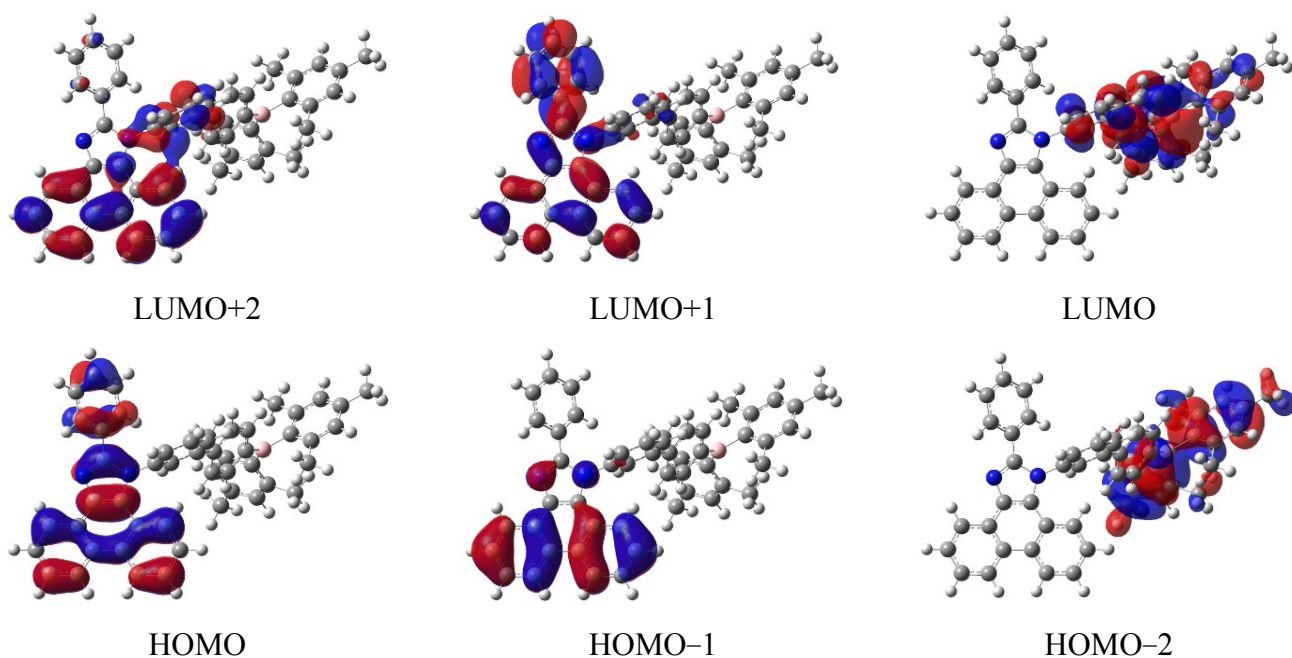

**Fig. S18** Frontier molecular orbitals of **2BP** from B3LYP/6-31G(d) calculations (Isovalue = 0.04) with CPCM in THF at the ground state ( $S_0$ ) optimized geometries.

**Table S15.** Computed absorption wavelengths ( $\lambda_{\text{calc}}$  in nm) and oscillator strengths ( $f_{\text{calc.}}$ ) for **2BP** from TD-B3LYP/6-31G(d) calculations in THF at the ground state ( $S_0$ ) optimized geometries

| state | $\lambda$ /nm | $f_{\text{calc}}$ | major contribution                                                     |
|-------|---------------|-------------------|------------------------------------------------------------------------|
| 1     | 395.64        | 0.0017            | HOMO $\rightarrow$ LUMO (98.9%)                                        |
| 2     | 360.69        | 0.2500            | HOMO-2 $\rightarrow$ LUMO (97.4%)                                      |
| 3     | 348.05        | 0.1000            | HOMO-3 $\rightarrow$ LUMO (96.5%)                                      |
| 4     | 336.35        | 0.1184            | HOMO-4 $\rightarrow$ LUMO (96.7%)                                      |
| 5     | 332.89        | 0.3432            | HOMO $\rightarrow$ LUMO+1 (69.4%)<br>HOMO $\rightarrow$ LUMO+2 (20.8%) |

**Table S16.** Molecular orbital energies (in eV) and distributions (in %) of **2BP** at the ground state ( $S_0$ ) optimized geometries

|        | E (eV) | Phenanthro-<br>imidazole | dimesitylborane | bridged phenyl |
|--------|--------|--------------------------|-----------------|----------------|
| LUMO+2 | -0.96  | 84.2                     | 1.3             | 14.4           |
| LUMO+1 | -1.18  | 96.5                     | 0.1             | 3.4            |
| LUMO   | -1.95  | 0.4                      | 52.5            | 47.1           |
| HOMO   | -5.44  | 99.6                     | 0.0             | 0.4            |
| HOMO-1 | -6.07  | 98.7                     | 0.2             | 1.1            |
| HOMO-2 | -6.14  | 0.0                      | 95.4            | 4.6            |

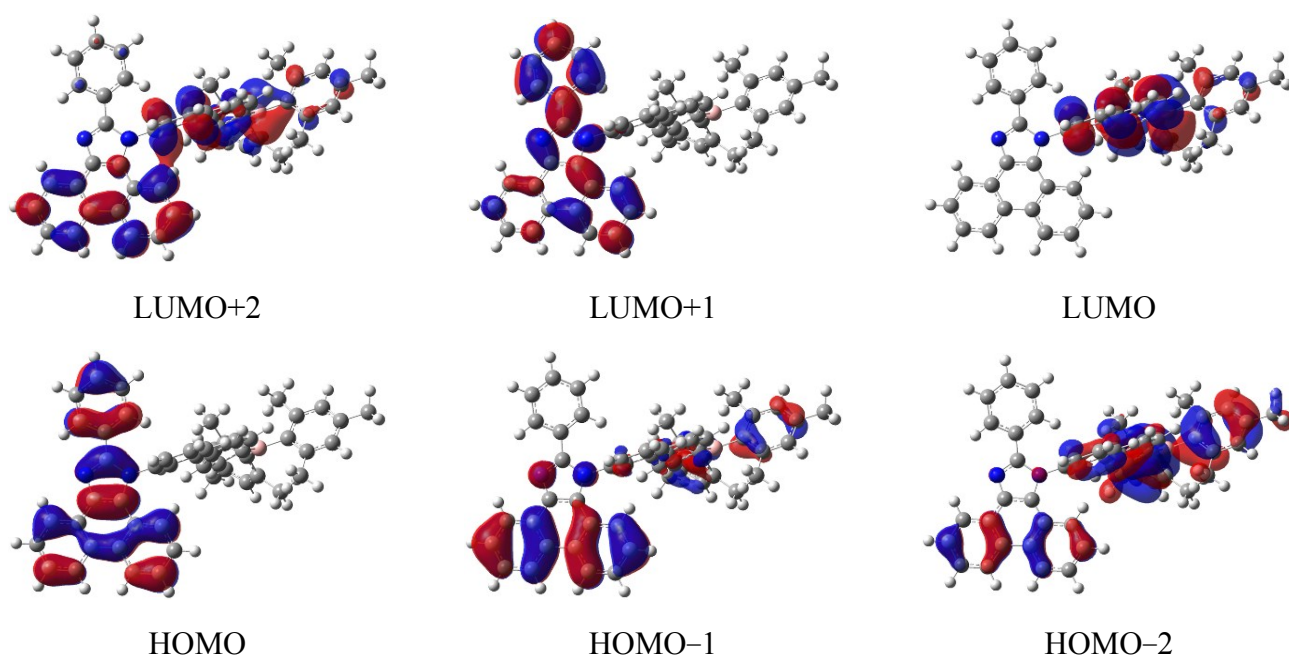

**Fig. S19** Frontier molecular orbitals of **2BP** from B3LYP/6-31G(d) calculations (Isovalue = 0.04) with CPCM in THF at the first excited state ( $S_1$ ) optimized geometries.

**Table S17.** Computed absorption wavelengths ( $\lambda_{\text{calc}}$  in nm) and oscillator strengths ( $f_{\text{calc.}}$ ) for **2BP** from TD-B3LYP/6-31G(d) calculations in THF at the first excited state ( $S_1$ ) optimized geometries

| state | $\lambda$ /nm | $f_{\text{calc}}$ | major contribution                                                     |
|-------|---------------|-------------------|------------------------------------------------------------------------|
| 1     | 509.59        | 0.0008            | HOMO $\rightarrow$ LUMO (99.3%)                                        |
| 2     | 397.26        | 0.0533            | HOMO-3 $\rightarrow$ LUMO (97.5%)                                      |
| 3     | 395.11        | 0.2832            | HOMO-2 $\rightarrow$ LUMO (77.0%)<br>HOMO-1 $\rightarrow$ LUMO (18.4%) |
| 4     | 378.34        | 0.0930            | HOMO-4 $\rightarrow$ LUMO (96.7%)                                      |
| 5     | 365.29        | 0.0010            | HOMO-2 $\rightarrow$ LUMO (19.3%)<br>HOMO-1 $\rightarrow$ LUMO (79.7%) |
| 6     | 364.58        | 0.0031            | HOMO-5 $\rightarrow$ LUMO (98.3%)                                      |
| 7     | 359.76        | 0.7166            | HOMO $\rightarrow$ LUMO+1 (90.9%)                                      |

**Table S18.** Molecular orbital energies (in eV) and distributions (in %) of **2BP** at the first excited state ( $S_1$ ) optimized geometries

|        | E (eV) | Phenanthro<br>-imidazole | dimesitylborane | bridged phenyl |
|--------|--------|--------------------------|-----------------|----------------|
| LUMO+2 | -0.94  | 53.6                     | 18.1            | 28.3           |
| LUMO+1 | -1.33  | 99.1                     | 0.0             | 0.9            |
| LUMO   | -2.36  | 0.5                      | 35.3            | 64.2           |
| HOMO   | -5.20  | 99.8                     | 0.0             | 0.2            |
| HOMO-1 | -6.11  | 81.5                     | 12.8            | 5.6            |
| HOMO-2 | -6.13  | 18.2                     | 64.3            | 17.5           |

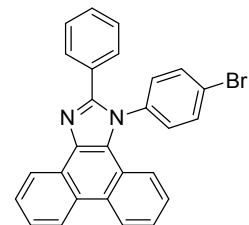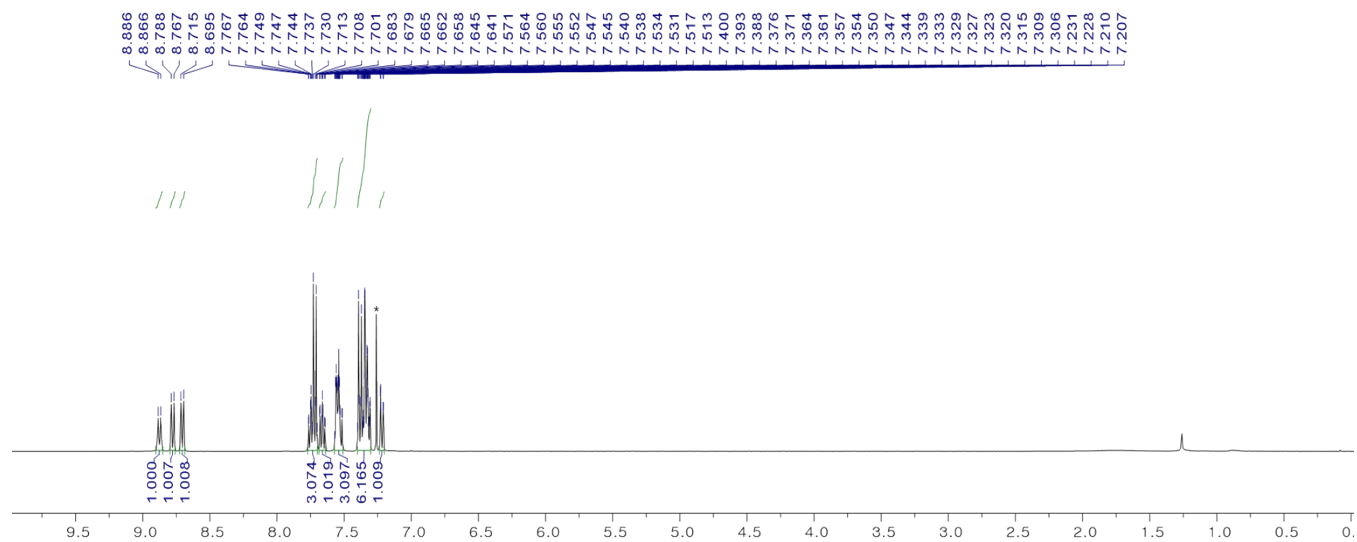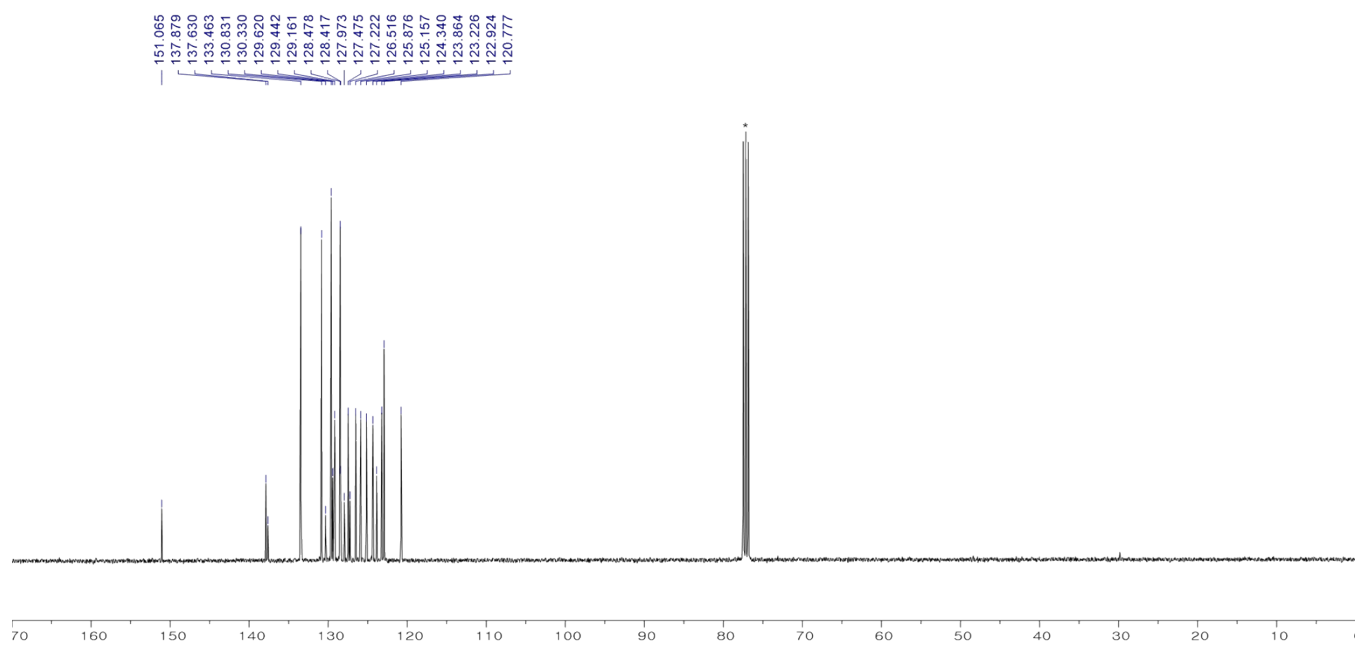

**Fig. S20**  $^1\text{H}$  (top) and  $^{13}\text{C}$  (bottom) NMR spectrum of **1a** (\* from residual  $\text{CHCl}_3$  in  $\text{CDCl}_3$ ).

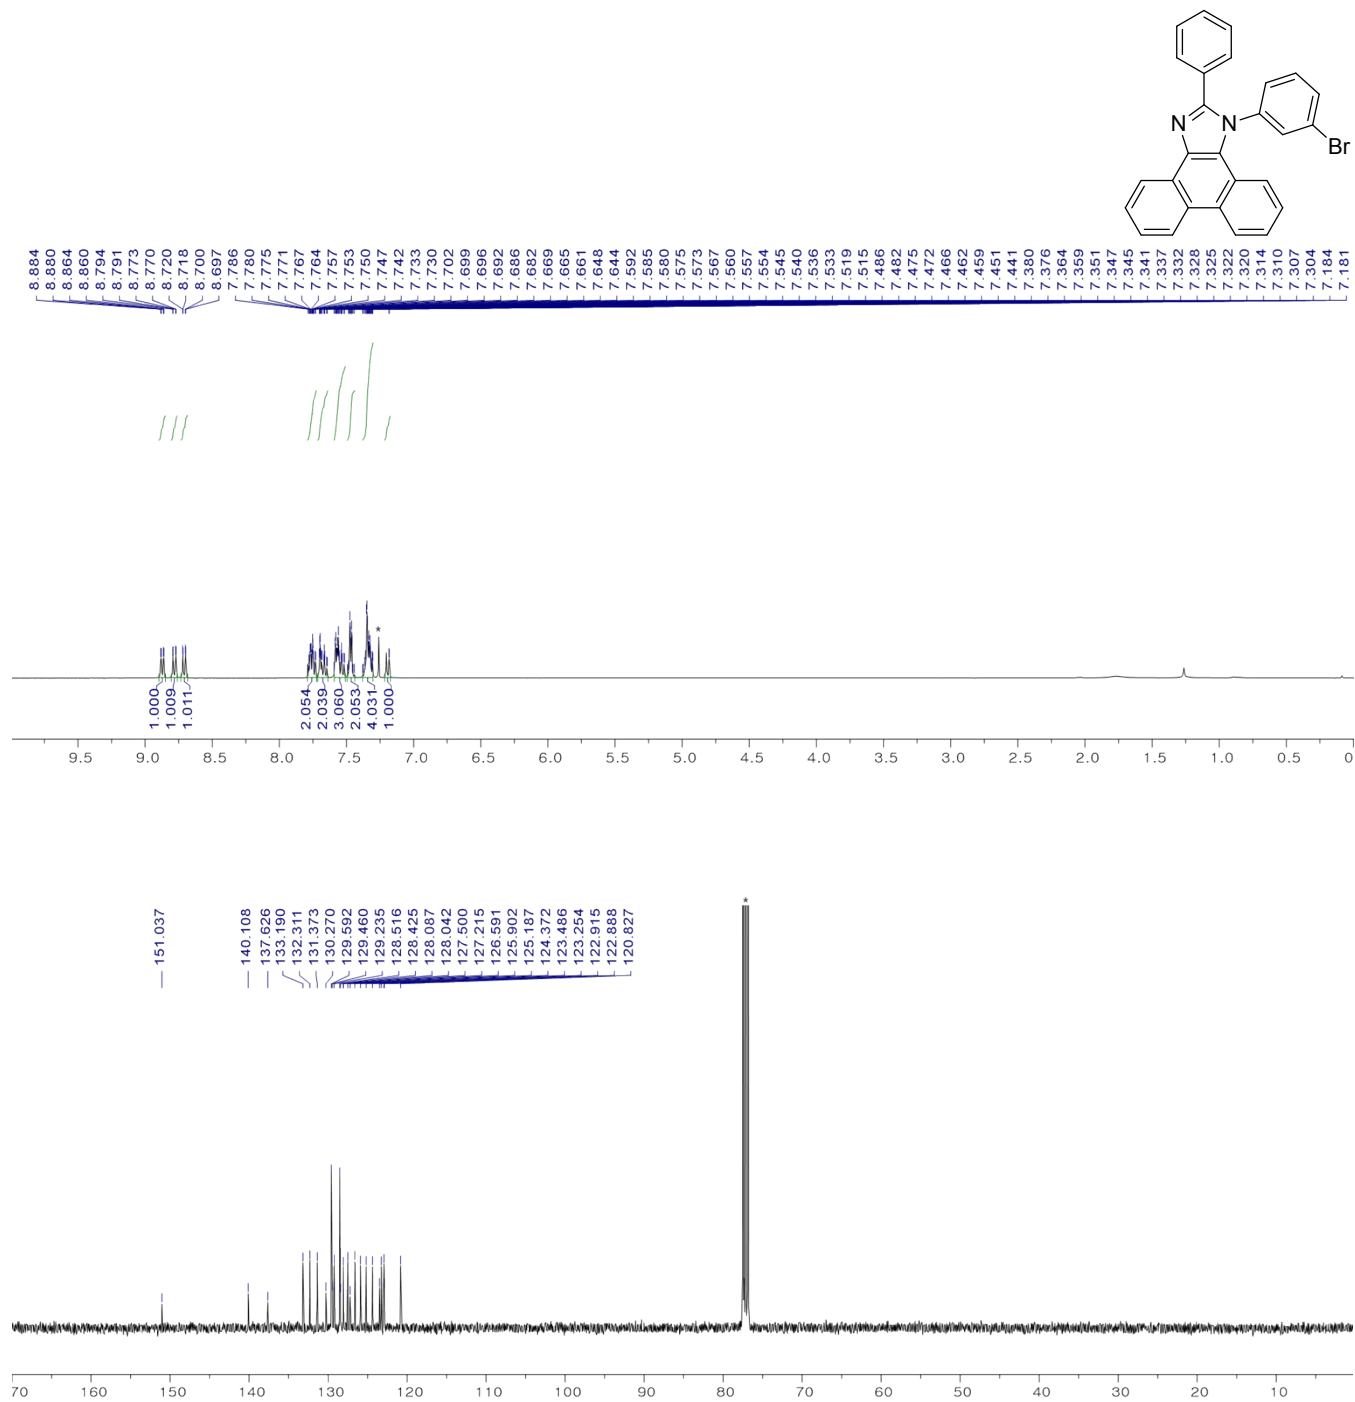

**Fig. S21** <sup>1</sup>H (top) and <sup>13</sup>C (bottom) NMR spectrum of **2a** (\* from residual CHCl<sub>3</sub> in CDCl<sub>3</sub>).

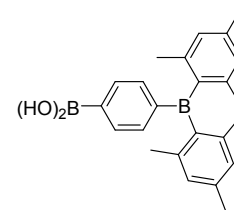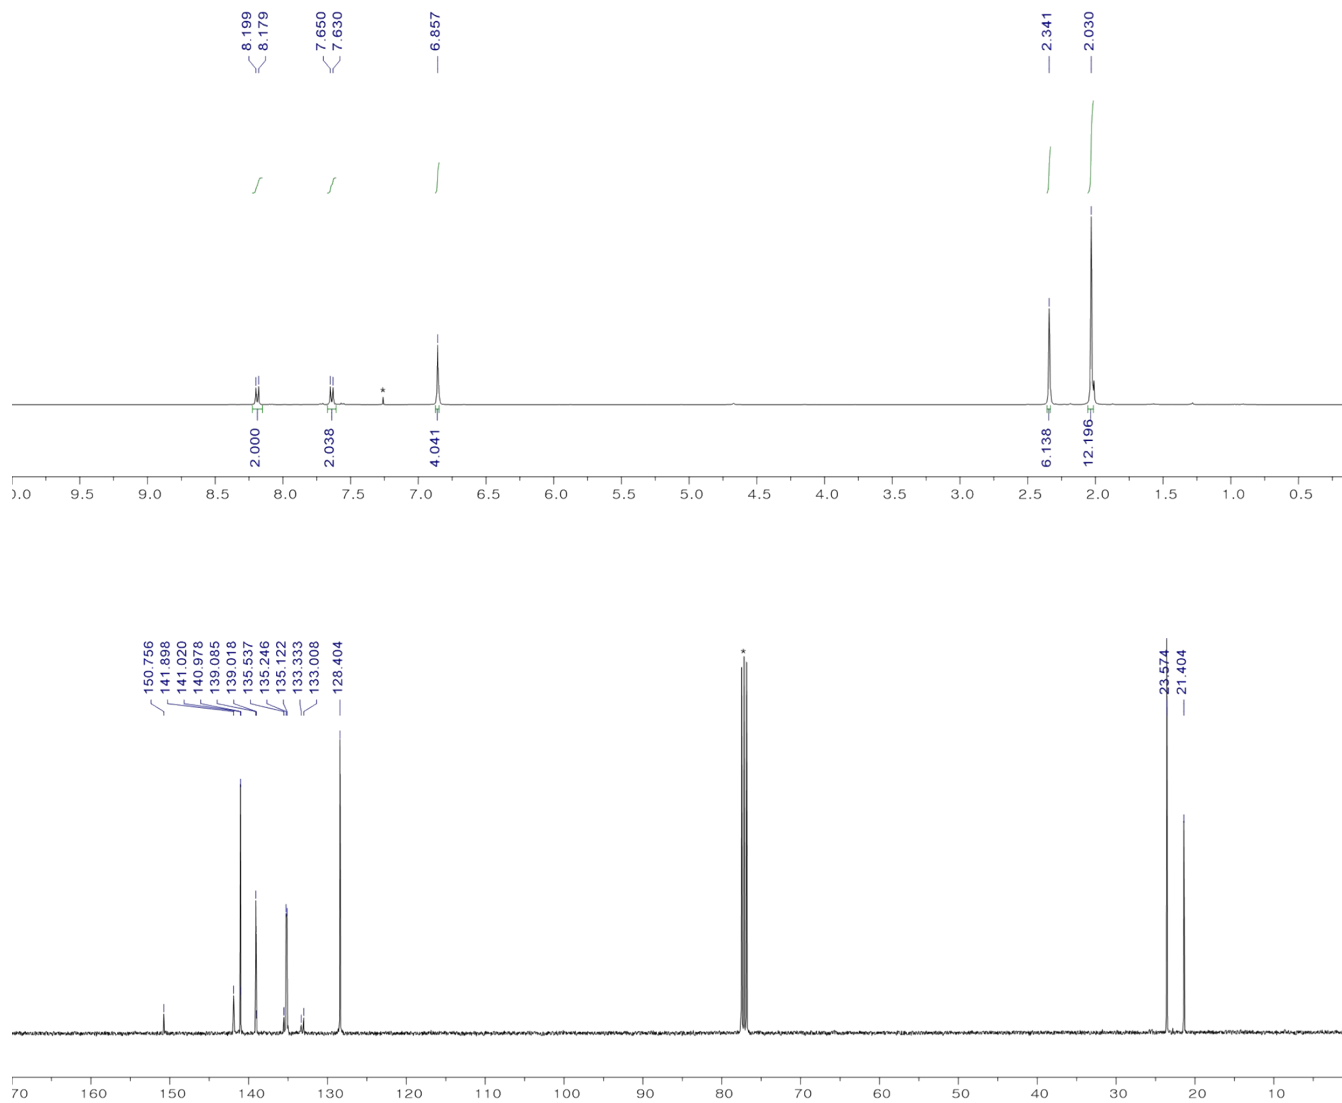

**Fig. S22** <sup>1</sup>H (top) and <sup>13</sup>C (bottom) NMR spectrum of **3a** (\* from residual CHCl<sub>3</sub> in CDCl<sub>3</sub>).



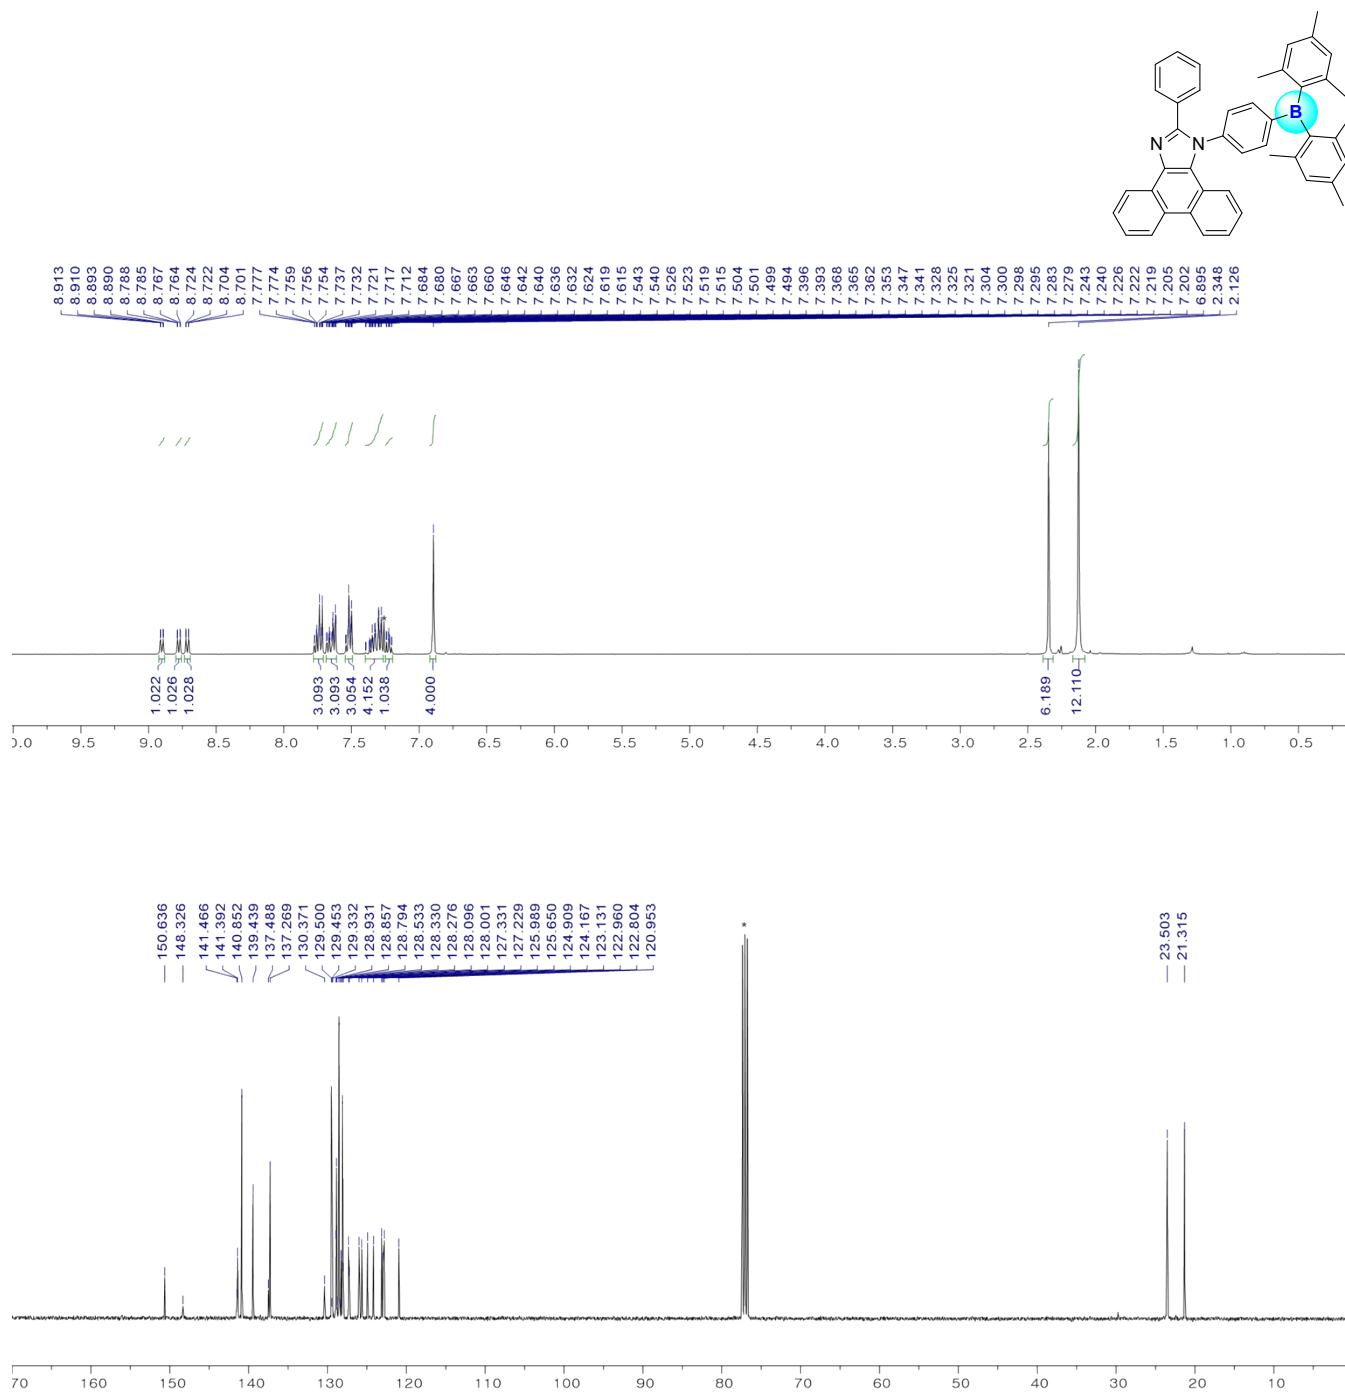

**Fig. S23** <sup>1</sup>H (top) and <sup>13</sup>C (bottom) NMR spectrum of **1Ph** (\* from residual CHCl<sub>3</sub> in CDCl<sub>3</sub>).

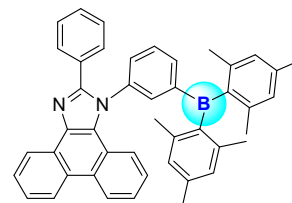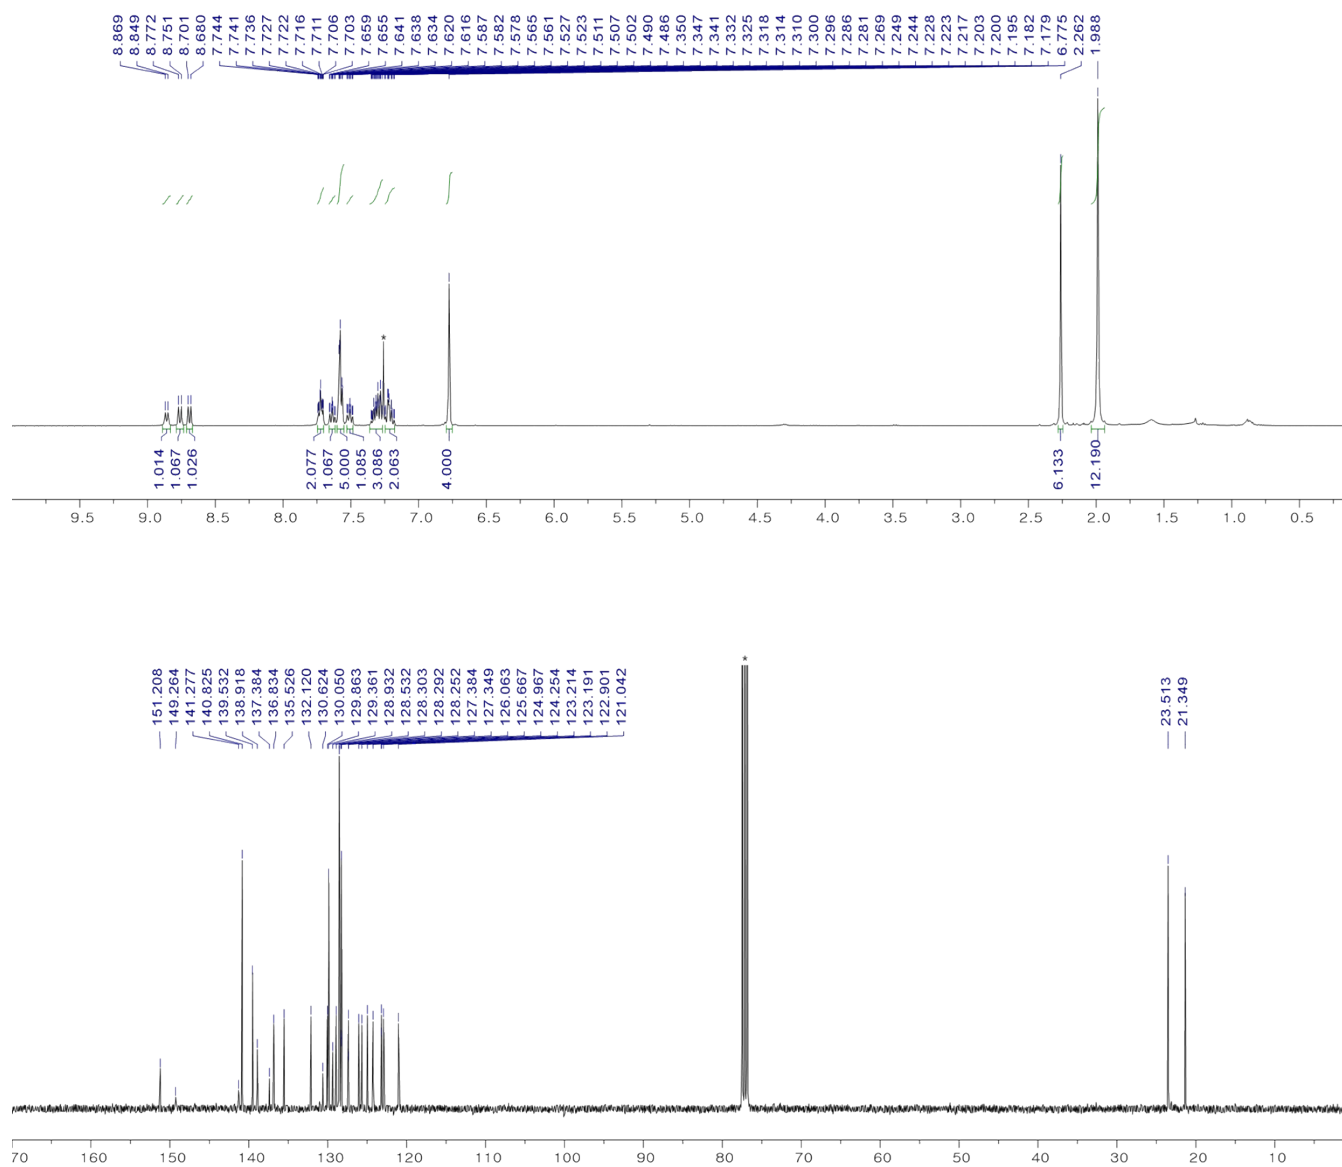

**Fig. S24** <sup>1</sup>H (top) and <sup>13</sup>C (bottom) NMR spectrum of **2Ph** (\* from residual CHCl<sub>3</sub> in CDCl<sub>3</sub>).

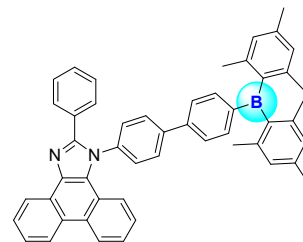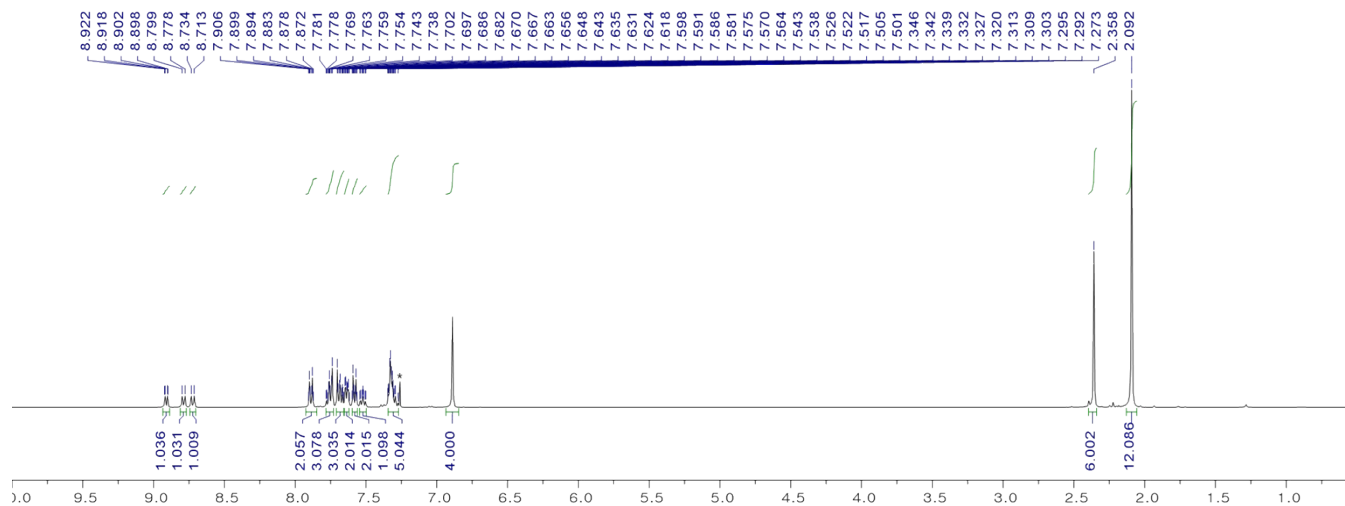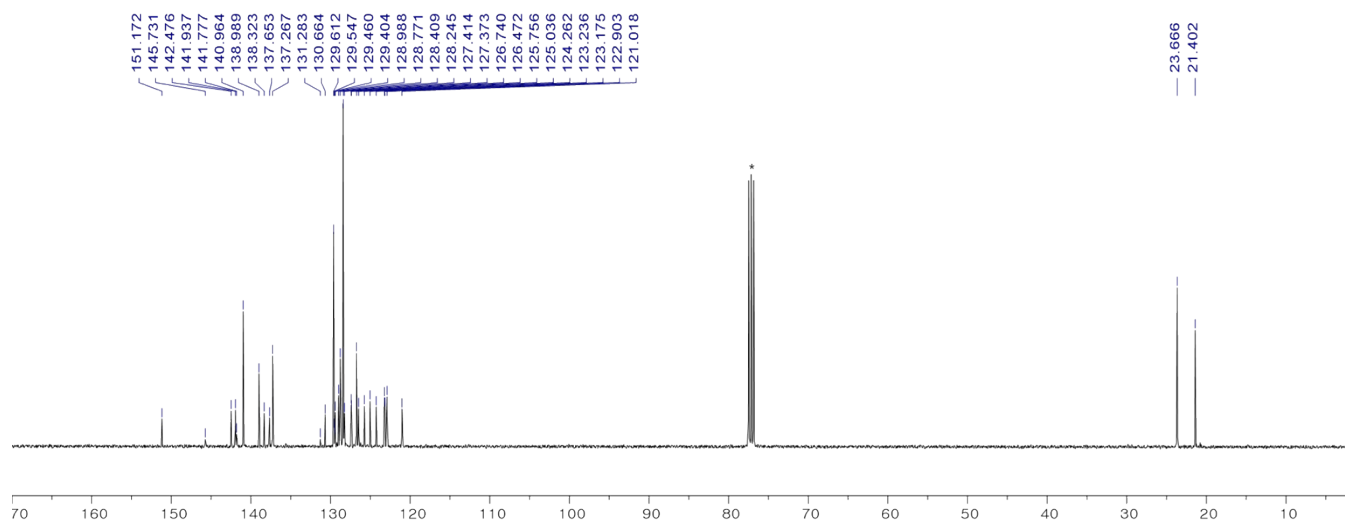

Fig. S25  $^1\text{H}$  (top) and  $^{13}\text{C}$  (bottom) NMR spectrum of **1BP** (\* from residual  $\text{CHCl}_3$  in  $\text{CDCl}_3$ ).

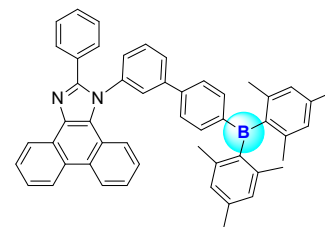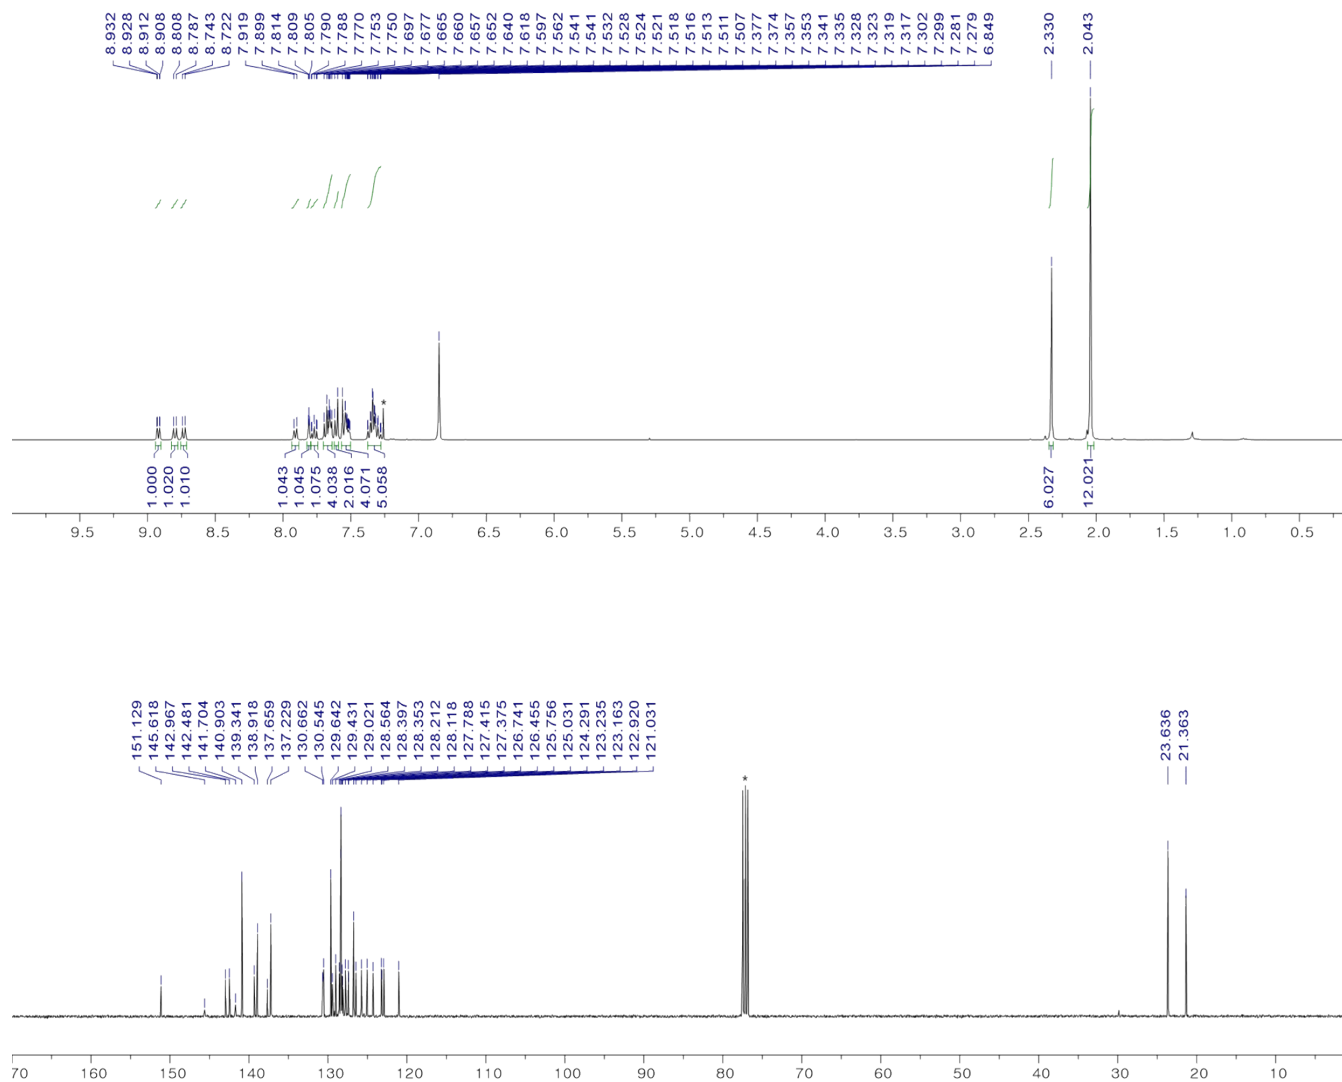

**Fig. S26** <sup>1</sup>H (top) and <sup>13</sup>C (bottom) NMR spectrum of **2BP** (\*from residual CHCl<sub>3</sub> in CDCl<sub>3</sub>).
